# Supplementary material for: Ancient and modern anticonvulsants act synergistically in a KCNQ potassium channel binding pocket
Source: PubMed Central journal article supplement (PMC6155021; doi:10.1038/s41467-018-06339-2), 2018-09-21
Supplement: 41467_2018_6339_MOESM1_ESM.pdf [file 41467_2018_6339_MOESM1_ESM.pdf]

**Ancient and modern anticonvulsants act synergistically in a KCNQ potassium channel binding pocket**

Manville et al.

| <b>KCNQ2/3</b>                                               | <b>Normalized tail current V<sub>0.5</sub> (mV)</b> | <b>Non-normalized tail current V<sub>0.5</sub> (mV)</b> | <b>Slope (mV)</b>    |
|--------------------------------------------------------------|-----------------------------------------------------|---------------------------------------------------------|----------------------|
| <b>Ctrl</b>                                                  | -41.9 ± 0.3<br>(n = 5)                              | -42.0 ± 4.7<br>(n = 5)                                  | 6.5 ± 0.3<br>(n = 5) |
| <b>100 μM<br/>3-ethyl-2-hydroxy<br/>-2-cyclopenten-1-one</b> | -41.0 ± 0.9<br>(n = 5)                              | -40.1 ± 1.9<br>(n = 5)                                  | 5.1 ± 0.9<br>(n = 5) |

**Supplementary Table 1. Summary of Effects of 3-ethyl-2-hydroxy-2-cyclopenten-1-one on KCNQ2/3 channels.**

Values indicate mean ± SEM.

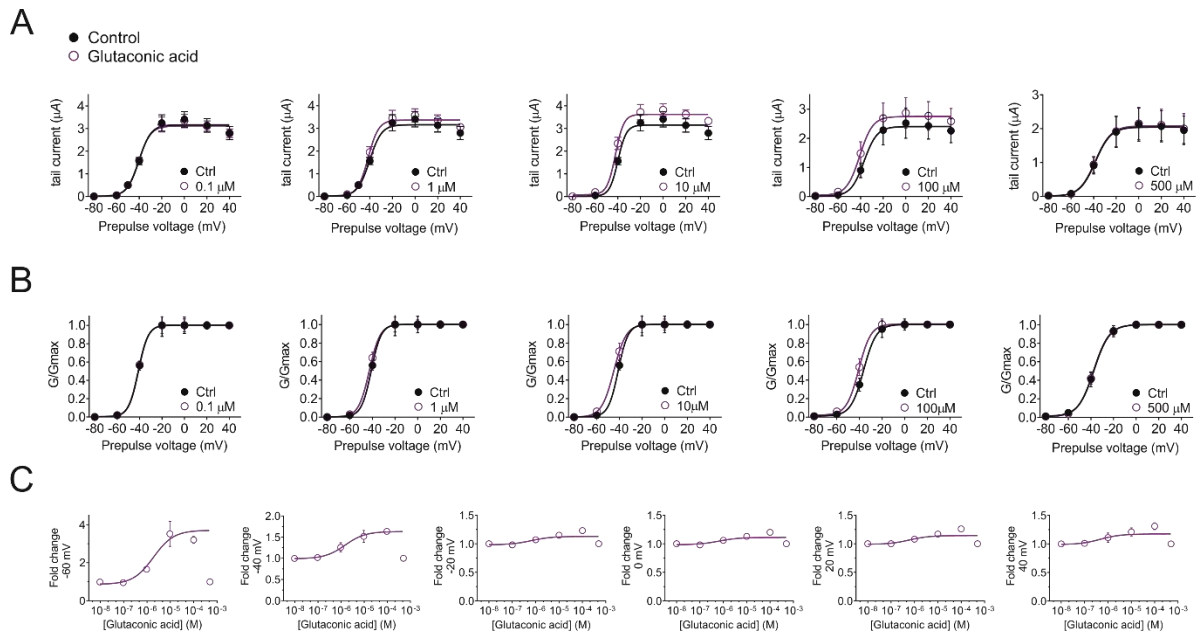

**Supplementary Figure 1. Effects of Glutaconic acid on KCNQ2/3 channels**

- A. Mean tail current versus prepulse voltage relationship for KCNQ2/3 channels in the absence (black) and presence (purple) of Glutaconic acid,  $n = 5$ .  
 B. Normalized tail current versus prepulse voltage relationships as in panel A,  $n = 5$ .  
 C. Dose response of KCNQ2/3 channels between -40 and +40 mV,  $n = 5$ . Error bars indicate SEM.

| KCNQ2/3                                          | Normalized tail current $V_{0.5}$ (mV) | Non-normalized tail current $V_{0.5}$ (mV) | Slope (mV)                   |
|--------------------------------------------------|----------------------------------------|--------------------------------------------|------------------------------|
| Ctrl                                             | $-36.9 \pm 1.7$<br>( $n = 5$ )         | $-36.1 \pm 1.7$<br>( $n = 5$ )             | $4.4 \pm 0.5$<br>( $n = 5$ ) |
| <b>0.1 <math>\mu</math>M<br/>Glutaconic Acid</b> | $-41.2 \pm 1.4$<br>( $n = 5$ )         | $-40.4 \pm 1.5$<br>( $n = 5$ )             | $4.4 \pm 3.7$<br>( $n = 5$ ) |
| <b>1 <math>\mu</math>M<br/>Glutaconic Acid</b>   | $-42.7 \pm 1.7$<br>( $n = 5$ )         | $-41.5 \pm 1.3$<br>( $n = 5$ )             | $4.8 \pm 2.4$<br>( $n = 5$ ) |
| <b>10 <math>\mu</math>M<br/>Glutaconic Acid</b>  | $-42.9 \pm 2.2$<br>( $n = 5$ )         | $-42.1 \pm 3.8$<br>( $n = 5$ )             | $5.4 \pm 2.3$<br>( $n = 5$ ) |
| <b>100 <math>\mu</math>M<br/>Glutaconic Acid</b> | $-40.7 \pm 1.2$<br>( $n = 5$ )         | $-40.8 \pm 3.8$<br>( $n = 5$ )             | $5.4 \pm 1.7$<br>( $n = 5$ ) |
| <b>500 <math>\mu</math>M<br/>Glutaconic Acid</b> | $-37.7 \pm 0.9$<br>( $n = 5$ )         | $-38.5 \pm 5.4$<br>( $n = 5$ )             | $6.8 \pm 0.9$<br>( $n = 5$ ) |

**Supplementary Table 2. Summary of Effects of Glutaconic acid on KCNQ2/3 channels.**

Values indicate mean  $\pm$  SEM.

| <b>KCNQ2/3</b>          | <b>Normalized tail current <math>V_{0.5}</math> (mV)</b> | <b>Non-normalized tail current <math>V_{0.5}</math> (mV)</b> | <b>Slope (mV)</b>   |
|-------------------------|----------------------------------------------------------|--------------------------------------------------------------|---------------------|
| <b>Ctrl</b>             | 41.8 ± 0.9<br>(n =5)                                     | -42.0 ± 5.1<br>(n =5)                                        | 5.7 ± 1.6<br>(n =5) |
| <b>100 μM 1-Heptene</b> | -41.8 ± 0.9<br>(n =5)                                    | -41.9 ± 4.9<br>(n =5)                                        | 5.8 ± 1.5<br>(n =5) |

**Supplementary Table 3. Summary of Effects of 1-Heptene on KCNQ2/3 channels.**

Values indicate mean ± SEM.

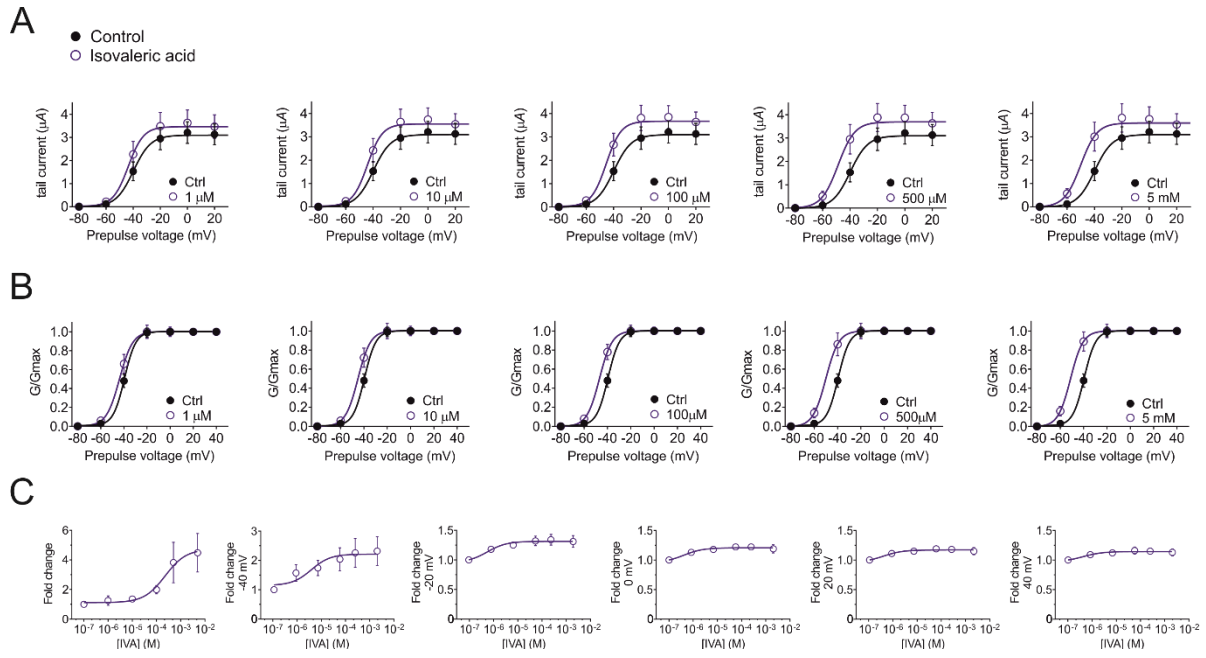

**Supplementary Figure 2. Effects of Isovaleric acid (IVA) on KCNQ2/3 channels**

- A. Mean tail current versus prepulse voltage relationship for KCNQ2/3 channels in the absence (black) and presence (blue) of Isovaleric acid,  $n = 4$ .  
 B. Normalized tail current versus prepulse voltage relationships as in panel A,  $n = 4$ .  
 C. Dose response of KCNQ2/3 channels between -40 and +40 mV,  $n = 4$ . Error bars indicate SEM.

| KCNQ2/3    | $\tau$ act, -40 mV (ms) | $\tau$ deact, -80 mV (ms) | Normalized tail current $V_{0.5}$ (mV) | Non-normalized tail current $V_{0.5}$ (mV) | Slope (mV)      |
|------------|-------------------------|---------------------------|----------------------------------------|--------------------------------------------|-----------------|
| Ctrl       | 621 ± 95 (n=4)          | 146 ± 11 (n=4)            | -39.5 ± 0.8 (n=4)                      | -39.9 ± 3.5 (n=4)                          | 4.9 ± 2.2 (n=4) |
| 1 μM IVA   | 494 ± 48 (n=4)          | 159 ± 12 (n=4)            | -43.8 ± 1.9 (n=4)                      | -43.6 ± 5.1 (n=4)                          | 5.7 ± 2.1 (n=4) |
| 10 μM IVA  | 474 ± 37 (n=4)          | 170 ± 6 (n=4)             | -45.1 ± 2.2 (n=4)                      | -44.2 ± 4.8 (n=4)                          | 5.4 ± 1.8 (n=4) |
| 100 μM IVA | 442 ± 22 (n=4)          | 192 ± 14 (n=4) *          | -46.8 ± 1.8 (n=4)                      | -45.4 ± 4.7 (n=4)                          | 5.4 ± 1.1 (n=4) |
| 500 μM IVA | 406 ± 18 (n=4)          | 219 ± 21 (n=4) *          | -50.1 ± 2.4 (n=4) *                    | -48.7 ± 5.2 (n=4)                          | 5.6 ± 1.2 (n=4) |
| 5 mM IVA   | 414 ± 23 (n=4)          | 241 ± 22 (n=4) *          | -51.2 ± 2.1 (n=4) **                   | -50.1 ± 5.2 (n=4)                          | 5.4 ± 1.1 (n=4) |

**Supplementary Table 4. Summary of Effects of IVA on KCNQ2/3 channels.**

Statistics versus same channel in absence of IVA: \*\* $p=0.007$ , \* $p=0.01$ . Values indicate mean ± SEM.

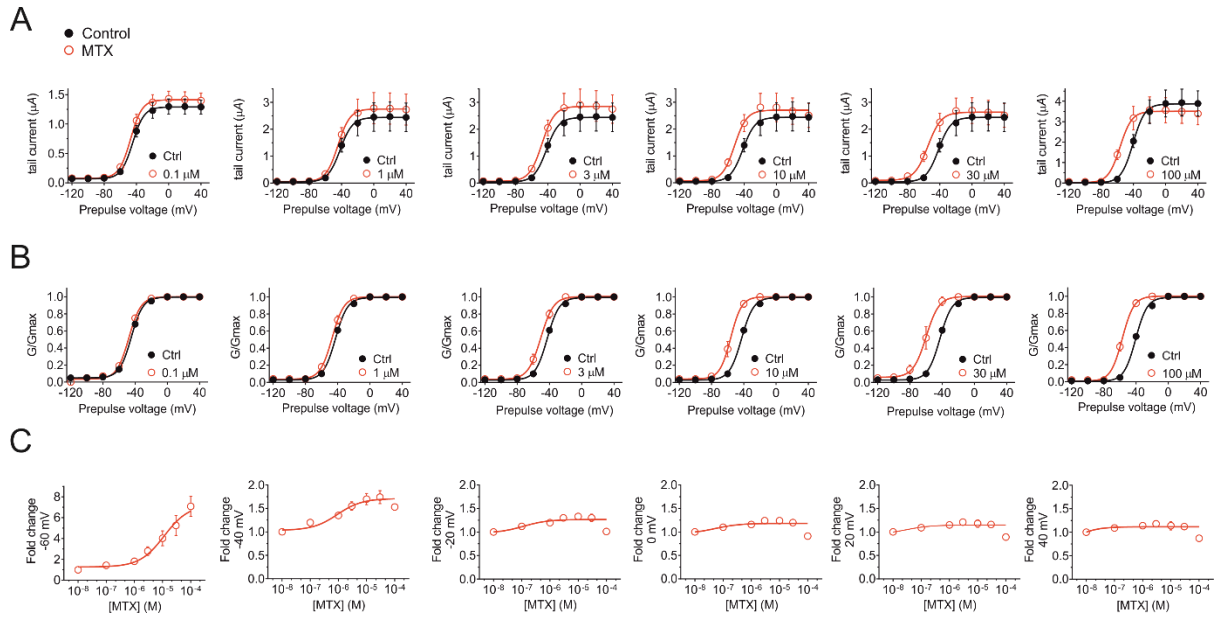

**Supplementary Figure 3. Effects of MTX on KCNQ2/3 channels**

- A. Mean tail current versus prepulse voltage relationship for KCNQ2/3 channels in the absence (black) and presence (red) of MTX,  $n = 5-9$ .  
 B. Normalized tail current versus prepulse voltage relationships as in panel A,  $n = 5-9$ .  
 C. Dose response of KCNQ2/3 channels between  $-40$  and  $+40$  mV,  $n = 5-9$ . Error bars indicate SEM.

| KCNQ2/3         | $\tau$ act, $-40$ mV (ms)       | $\tau$ deact, $-80$ mV (ms) | Normalized tail current $V_{0.5}$ (mV) | Non-normalized tail current $V_{0.5}$ (mV) | Slope (mV)                   |
|-----------------|---------------------------------|-----------------------------|----------------------------------------|--------------------------------------------|------------------------------|
| Ctrl            | $691 \pm 54$<br>( $n = 9$ )     | $222 \pm 24$<br>( $n = 9$ ) | $-42.8 \pm 0.5$<br>( $n = 9$ )         | $-41.7 \pm 4.8$<br>( $n = 9$ )             | $7.3 \pm 0.4$<br>( $n = 9$ ) |
| 0.1 $\mu$ M MTX | $684 \pm 55$<br>( $n = 5$ )     | $236 \pm 12$<br>( $n = 5$ ) | $-47.8 \pm 0.5$<br>( $n = 5$ ) **      | $-47.3 \pm 2.4$<br>( $n = 5$ )             | $7.5 \pm 0.4$<br>( $n = 5$ ) |
| 1 $\mu$ M MTX   | $611 \pm 46$<br>( $n = 9$ )     | $227 \pm 20$<br>( $n = 9$ ) | $-47.0 \pm 0.9$<br>( $n = 9$ ) **      | $-44.4 \pm 4.9$<br>( $n = 9$ )             | $7.4 \pm 0.6$<br>( $n = 9$ ) |
| 3 $\mu$ M MTX   | $530 \pm 37$<br>( $n = 9$ ) *   | $259 \pm 12$<br>( $n = 9$ ) | $-50.7 \pm 1.0$<br>( $n = 9$ ) ***     | $-47.3 \pm 5.0$<br>( $n = 9$ )             | $7.9 \pm 0.8$<br>( $n = 9$ ) |
| 10 $\mu$ M MTX  | $462 \pm 34$<br>( $n = 9$ ) **  | $261 \pm 7$<br>( $n = 9$ )  | $-56.2 \pm 1.3$<br>( $n = 9$ ) ****    | $-51.9 \pm 4.8$<br>( $n = 9$ )             | $6.8 \pm 1.3$<br>( $n = 9$ ) |
| 30 $\mu$ M MTX  | $403 \pm 33$<br>( $n = 9$ ) *** | $259 \pm 18$<br>( $n = 9$ ) | $-60.0 \pm 1.8$<br>( $n = 9$ ) ****    | $-54.9 \pm 4.9$<br>( $n = 9$ )             | $8.0 \pm 1.8$<br>( $n = 9$ ) |
| 100 $\mu$ M MTX | $403 \pm 34$<br>( $n = 5$ ) *** | $415 \pm 87$<br>( $n = 5$ ) | $-57.1 \pm 0.6$<br>( $n = 5$ ) ****    | $-56.6 \pm 3.8$<br>( $n = 5$ )             | $7.2 \pm 0.5$<br>( $n = 5$ ) |

**Supplementary Table 5. Summary of Effects of MTX on KCNQ2/3 channels.**

Statistics versus same channel in absence of MTX: \*\*\*\* $p < 0.0001$ , \*\*\* $p = 0.0002$ , \*\* $p = 0.001$ , \* $p = 0.02$ . Values indicate mean  $\pm$  SEM.

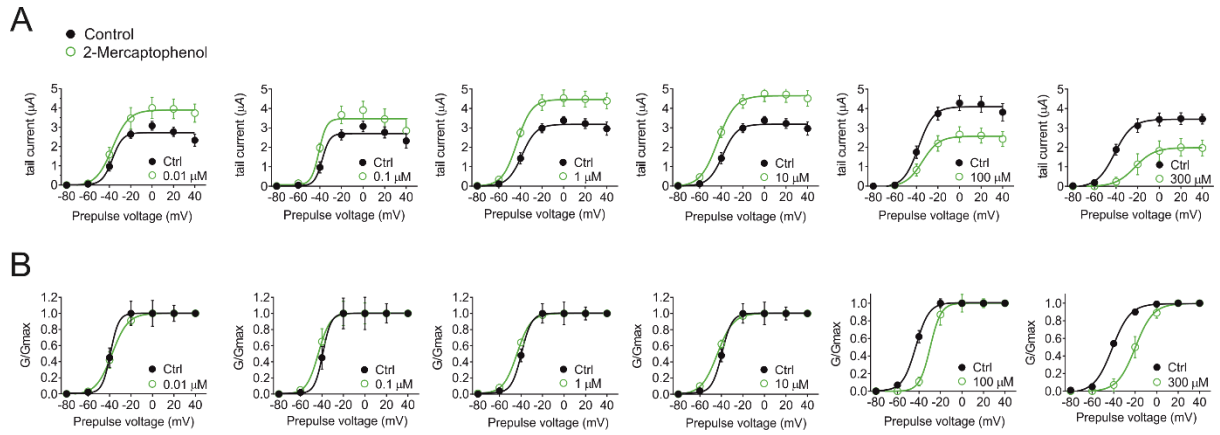

**Supplementary Figure 4. Effects of 2-Mercaptophenol on KCNQ2/3 channels**

- A. Mean tail current versus prepulse voltage relationship for KCNQ2/3 channels in the absence (black) and presence (green) of 2-Mercaptophenol,  $n = 4-6$ .
- B. Normalized tail current versus prepulse voltage relationships as in panel A,  $n = 4-6$ .
- C. Dose response of KCNQ2/3 channels between  $-40$  and  $+40$  mV,  $n = 4-6$ . Error bars indicate SEM.

| KCNQ2/3                                            | Normalized tail current $V_{0.5}$ (mV) | Non-normalized tail current $V_{0.5}$ (mV) | Slope (mV)                   |
|----------------------------------------------------|----------------------------------------|--------------------------------------------|------------------------------|
| Ctrl                                               | $-39.2 \pm 2.8$<br>( $n = 6$ )         | $-37.1 \pm 1.2$<br>( $n = 6$ )             | $3.8 \pm 1.2$<br>( $n = 6$ ) |
| <b>0.01 <math>\mu</math>M<br/>2-Mercaptophenol</b> | $-37.7 \pm 1.5$<br>( $n = 6$ )         | $-37.2 \pm 3.7$<br>( $n = 6$ )             | $7.4 \pm 1.6$<br>( $n = 6$ ) |
| <b>0.1 <math>\mu</math>M<br/>2-Mercaptophenol</b>  | $-43.4 \pm 3.6$<br>( $n = 6$ )         | $-40.9 \pm 3.2$<br>( $n = 6$ )             | $5.4 \pm 1.2$<br>( $n = 6$ ) |
| <b>1 <math>\mu</math>M<br/>2-Mercaptophenol</b>    | $-43.6 \pm 0.8$<br>( $n = 6$ )         | $-43.2 \pm 2.6$<br>( $n = 6$ )             | $6.4 \pm 0.9$<br>( $n = 6$ ) |
| <b>10 <math>\mu</math>M<br/>2-Mercaptophenol</b>   | $-43.7 \pm 1.1$<br>( $n = 6$ )         | $-43.2 \pm 2.8$<br>( $n = 6$ )             | $7.4 \pm 1.1$<br>( $n = 6$ ) |
| <b>100 <math>\mu</math>M<br/>2-Mercaptophenol</b>  | $-29.5 \pm 2.5$<br>( $n = 6$ ) *       | $-34.5 \pm 4.6$<br>( $n = 6$ )             | $5.0 \pm 1.2$<br>( $n = 6$ ) |
| <b>300 <math>\mu</math>M<br/>2-Mercaptophenol</b>  | $-19.8 \pm 1.4$<br>( $n = 4$ ) ***     | $-22.5 \pm 7.2$<br>( $n = 4$ )             | $8.3 \pm 0.9$<br>( $n = 4$ ) |

**Supplementary Table 6. Summary of Effects of 2-Mercaptophenol on KCNQ2/3 channels.**

Statistics versus same channel in absence of 2-Mercaptophenol: \*\*\*  $p=0.004$ , \*  $p=0.02$ . Values indicate mean  $\pm$  SEM.

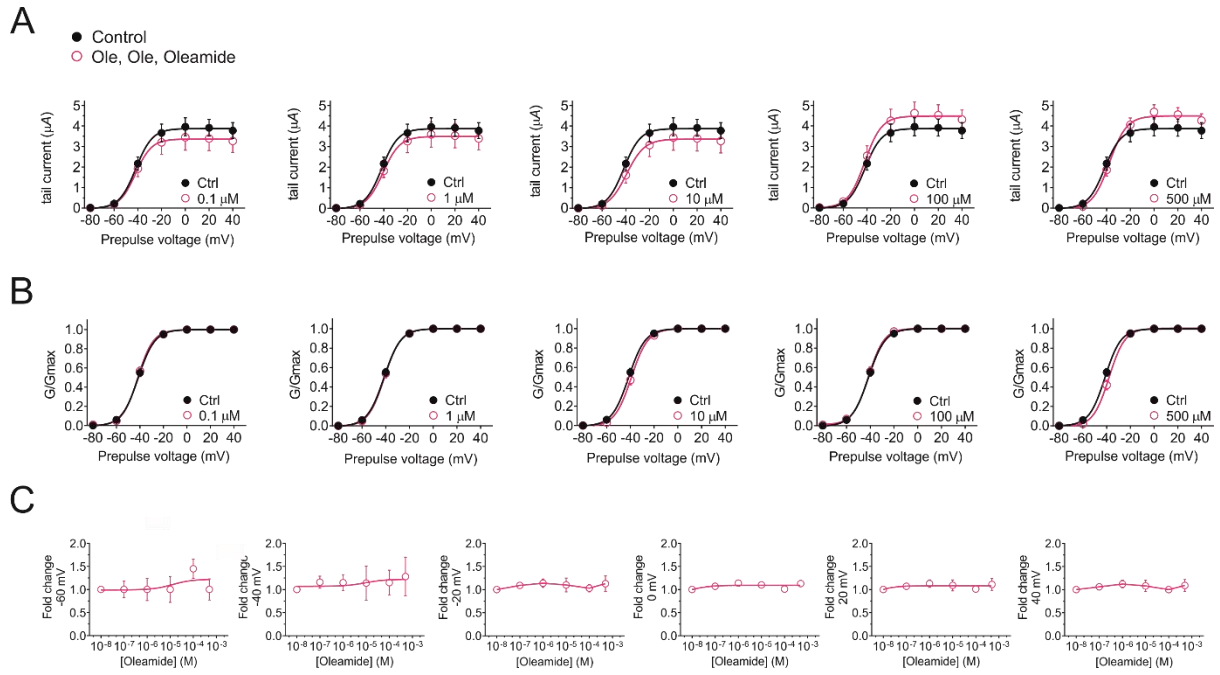

**Supplementary Figure 5. Effects of Oleamide on KCNQ2/3 channels**

- A. Mean tail current versus prepulse voltage relationship for KCNQ2/3 channels in the absence (black) and presence (pink) of Oleamide,  $n = 8-16$ .  
 B. Normalized tail current versus prepulse voltage relationships as in panel A,  $n = 8-16$ .  
 C. Dose response of KCNQ2/3 channels between  $-40$  and  $+40$  mV,  $n = 8-16$ . Error bars indicate SEM.

| KCNQ2/3              | Normalized tail current $V_{0.5}$ (mV) | Non-normalized tail current $V_{0.5}$ (mV) | Slope (mV)                    |
|----------------------|----------------------------------------|--------------------------------------------|-------------------------------|
| Ctrl                 | $-41.5 \pm 0.6$<br>( $n = 16$ )        | $-41.7 \pm 3.1$<br>( $n = 16$ )            | $7.1 \pm 0.8$<br>( $n = 16$ ) |
| 0.1 $\mu$ M Oleamide | $-41.8 \pm 0.6$<br>( $n = 8$ )         | $-41.9 \pm 4.8$<br>( $n = 8$ )             | $6.5 \pm 0.9$<br>( $n = 8$ )  |
| 1 $\mu$ M Oleamide   | $-41.5 \pm 0.8$<br>( $n = 8$ )         | $-41.6 \pm 4.3$<br>( $n = 8$ )             | $6.7 \pm 1.1$<br>( $n = 8$ )  |
| 10 $\mu$ M Oleamide  | $-39.2 \pm 0.8$<br>( $n = 8$ )         | $-39.4 \pm 4.8$<br>( $n = 8$ )             | $7.0 \pm 0.8$<br>( $n = 8$ )  |
| 100 $\mu$ M Oleamide | $-41.5 \pm 0.8$<br>( $n = 9$ )         | $-41.9 \pm 3.5$<br>( $n = 9$ )             | $6.6 \pm 0.8$<br>( $n = 9$ )  |
| 500 $\mu$ M Oleamide | $-37.9 \pm 0.8$<br>( $n = 8$ )         | $-37.6 \pm 2.1$<br>( $n = 8$ )             | $6.7 \pm 0.6$<br>( $n = 8$ )  |

**Supplementary Table 7. Summary of Effects of Oleamide on KCNQ2/3 channels.**

Values indicate mean  $\pm$  SEM.



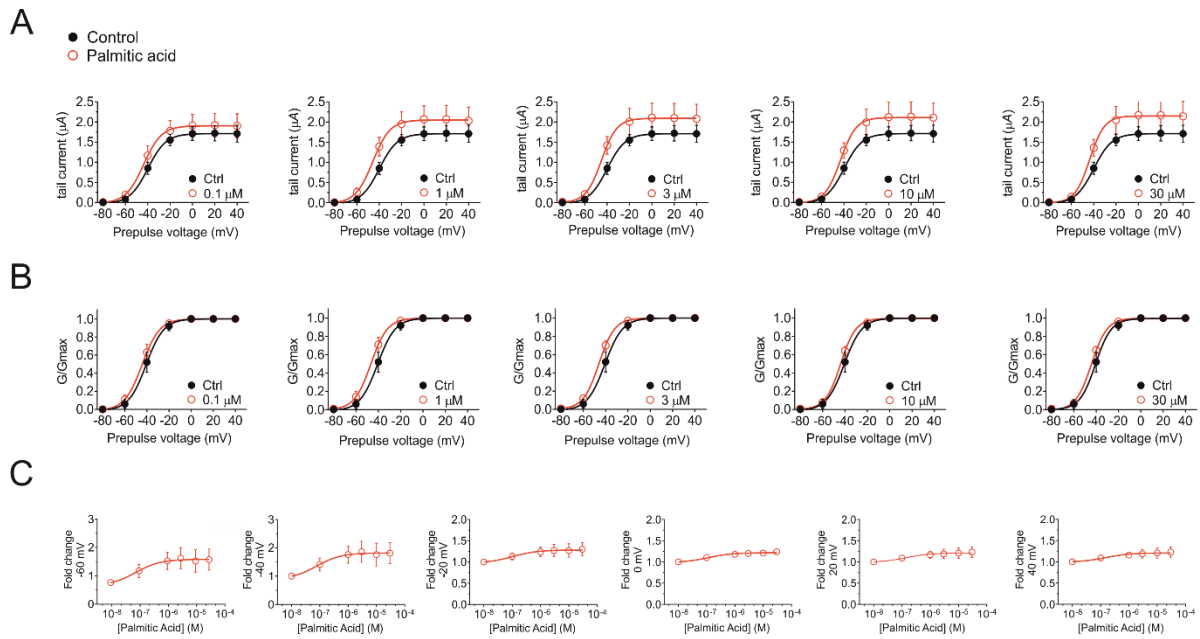

**Supplementary Figure 6. Effects of palmitic acid on KCNQ2/3 channels**

- A. Mean tail current versus prepulse voltage relationship for KCNQ2/3 channels in the absence (black) and presence (red) of palmitic acid,  $n = 5$ .  
 B. Normalized tail current versus prepulse voltage relationships as in panel A,  $n = 5$ .  
 C. Dose response of KCNQ2/3 channels between -40 and +40 mV,  $n = 5$ . Error bars indicate SEM.

| KCNQ2/3                   | Normalized tail current $V_{0.5}$ (mV) | Non-normalized tail current $V_{0.5}$ (mV) | Slope (mV)                   |
|---------------------------|----------------------------------------|--------------------------------------------|------------------------------|
| Ctrl                      | $-40.7 \pm 1.9$<br>( $n = 5$ )         | $-39.9 \pm 3.1$<br>( $n = 5$ )             | $7.9 \pm 2.1$<br>( $n = 5$ ) |
| 0.1 $\mu$ M Palmitic Acid | $-44.3 \pm 1.7$<br>( $n = 5$ )         | $-43.6 \pm 5.0$<br>( $n = 5$ )             | $7.9 \pm 1.7$<br>( $n = 5$ ) |
| 1 $\mu$ M Palmitic Acid   | $-46.6 \pm 1.7$<br>( $n = 5$ )         | $-45.6 \pm 5.5$<br>( $n = 5$ )             | $7.4 \pm 1.7$<br>( $n = 5$ ) |
| 3 $\mu$ M Palmitic Acid   | $-46.5 \pm 1.1$<br>( $n = 5$ )         | $-45.1 \pm 5.4$<br>( $n = 5$ )             | $7.1 \pm 1.1$<br>( $n = 5$ ) |
| 10 $\mu$ M Palmitic Acid  | $-44.9 \pm 0.9$<br>( $n = 5$ )         | $-43.1 \pm 4.9$<br>( $n = 5$ )             | $6.8 \pm 0.9$<br>( $n = 5$ ) |
| 30 $\mu$ M Palmitic Acid  | $-44.3 \pm 1.4$<br>( $n = 5$ )         | $-43.5 \pm 4.9$<br>( $n = 5$ )             | $7.0 \pm 1.1$<br>( $n = 5$ ) |

**Supplementary Table 8. Summary of Effects of Palmitic acid on KCNQ2/3 channels.**

Statistics versus same channel in absence of Palmitic acid: \*\* $p=0.007$ , \* $p=0.01$ . Values indicate mean  $\pm$  SEM.

| KCNQ2/3            | Normalized tail current $V_{0.5}$ (mV) | Non-normalized tail current $V_{0.5}$ (mV) | Slope (mV)          |
|--------------------|----------------------------------------|--------------------------------------------|---------------------|
| Ctrl               | -37.5 ± 1.5<br>(n =5)                  | -38.2 ± 5.8<br>(n =5)                      | 6.7 ± 1.9<br>(n =5) |
| 100 μM Sorbic Acid | -39.9 ± 0.9<br>(n =5)                  | -39.9 ± 3.0<br>(n =5)                      | 4.2 ± 0.9<br>(n =5) |

**Supplementary Table 9. Summary of Effects of Sorbic acid on KCNQ2/3 channels.**

Values indicate mean ± SEM.

| KCNQ2/3   | $\tau$ act, -60 mV (ms) | $\tau$ act, -40 mV (ms) | $\tau$ act, -20 mV (ms) |
|-----------|-------------------------|-------------------------|-------------------------|
| Ctrl      | 1726 ± 200<br>(n =9)    | 802 ± 69<br>(n =9)      | 276 ± 24<br>(n =9)      |
| 30 μM MTX | 835 ± 51<br>(n =9) **   | 397 ± 26<br>(n =9) **   | 205 ± 6<br>(n =9) **    |

**Supplementary Table 10. Summary of effects of MTX on KCNQ2/3 channel activation kinetics.**

Statistics versus same channel in absence of 30 μM MTX: \*\*p=0.002.

| KCNQ2/3   | $\tau$ deact, -120 mV (ms) | $\tau$ deact, -110 mV (ms) | $\tau$ deact, -100 mV (ms) | $\tau$ deact, -90 mV (ms) | $\tau$ deact, -80 mV (ms) |
|-----------|----------------------------|----------------------------|----------------------------|---------------------------|---------------------------|
| Ctrl      | 21 ± 1.0<br>(n =5)         | 30 ± 1.3<br>(n =5)         | 42 ± 1.9<br>(n =5)         | 58 ± 2.7<br>(n =5)        | 81 ± 26<br>(n =5)         |
| 30 μM MTX | 36 ± 1.2<br>(n =5)         | 53 ± 3.5<br>(n =5)         | 77 ± 6.2<br>(n =5)         | 105 ± 4.2<br>(n =5)       | 143 ± 39<br>(n =5)        |

**Supplementary Table 11. Summary of effects of MTX on KCNQ2/3 channel deactivation kinetics.**

Statistics versus same channel in absence of 30 μM MTX: \*\*\*\*p<0.0001, \*\*\*p=0.0003, \*\*p=0.002.

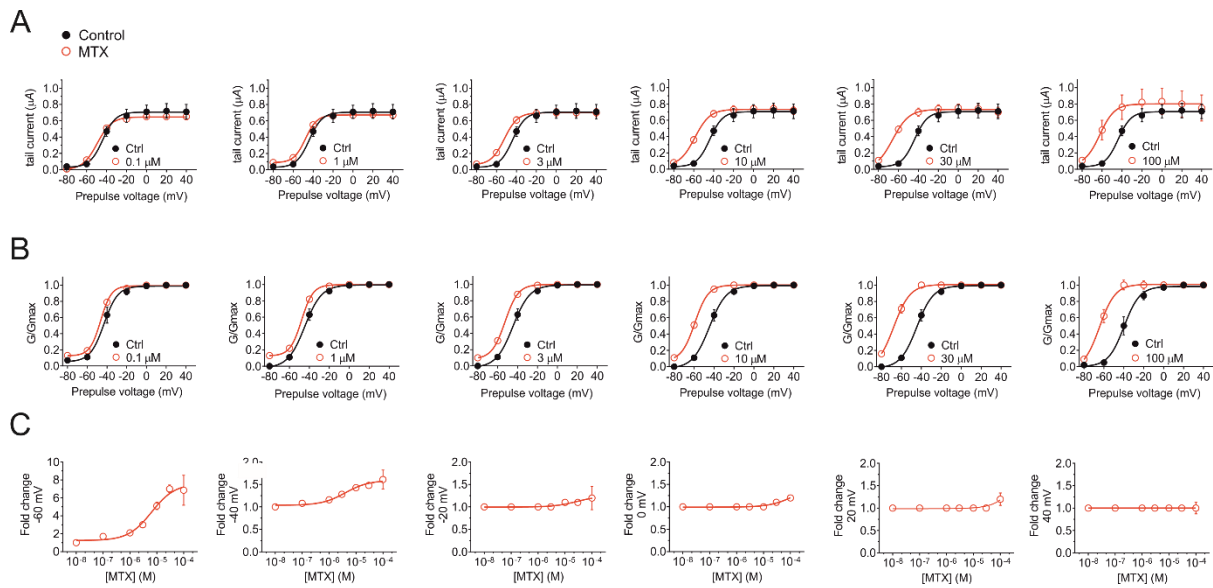

**Supplementary Figure 7. Effects of MTX on KCNQ2 channels**

- A. Mean tail current versus prepulse voltage relationship for KCNQ2 channels in the absence (black) and presence (red) of MTX,  $n = 5-10$ .  
 B. Normalized tail current versus prepulse voltage relationships as in panel A,  $n = 5-10$ .  
 C. Dose response of KCNQ2 channels between  $-40$  and  $+40$  mV,  $n = 5-10$ . Error bars indicate SEM.

| KCNQ2                            | $\tau$ act, $-40$ mV (ms)      | $\tau$ deact, $-80$ mV (ms)  | Normalized tail current $V_{0.5}$ (mV) | Non-normalized tail current $V_{0.5}$ (mV) | Slope (mV)                   |
|----------------------------------|--------------------------------|------------------------------|----------------------------------------|--------------------------------------------|------------------------------|
| Ctrl                             | $647 \pm 47$<br>( $n=10$ )     | $390 \pm 53$<br>( $n=10$ )   | $-44.5 \pm 1.4$<br>( $n=10$ )          | $-44.0 \pm 3.9$<br>( $n=10$ )              | $7.5 \pm 0.31$<br>( $n=10$ ) |
| <b>0.1 <math>\mu</math>M MTX</b> | $538 \pm 20$<br>( $n=5$ )      | $294 \pm 10$<br>( $n=5$ )    | $-50.0 \pm 0.35$<br>( $n=5$ ) **       | $-50.0 \pm 0.4$<br>( $n=5$ )               | $7.4 \pm 0.23$<br>( $n=5$ )  |
| <b>1 <math>\mu</math>M MTX</b>   | $490 \pm 23$<br>( $n=5$ ) *    | $271 \pm 11$<br>( $n=5$ )    | $-51.4 \pm 0.46$<br>( $n=5$ ) ***      | $-51.7 \pm 2.0$<br>( $n=5$ )               | $7.4 \pm 0.31$<br>( $n=5$ )  |
| <b>3 <math>\mu</math>M MTX</b>   | $417 \pm 25$<br>( $n=5$ ) **** | $237 \pm 12$<br>( $n=5$ ) *  | $-54.9 \pm 0.41$<br>( $n=5$ ) ****     | $-52.1 \pm 2.5$<br>( $n=5$ )               | $7.3 \pm 0.33$<br>( $n=5$ )  |
| <b>10 <math>\mu</math>M MTX</b>  | $341 \pm 22$<br>( $n=5$ ) **** | $199 \pm 11$<br>( $n=5$ ) ** | $-61.2 \pm 0.87$<br>( $n=5$ ) ****     | $-61.7 \pm 2.7$<br>( $n=5$ ) **            | $7.0 \pm 1.0$<br>( $n=5$ )   |
| <b>30 <math>\mu</math>M MTX</b>  | $301 \pm 19$<br>( $n=5$ ) **** | $173 \pm 10$<br>( $n=5$ ) ** | $-68.5 \pm 1.5$<br>( $n=5$ ) ****      | $-68.7 \pm 2.7$<br>( $n=5$ ) ***           | $7.4 \pm 0.6$<br>( $n=5$ )   |
| <b>100 <math>\mu</math>M MTX</b> | $353 \pm 22$<br>( $n=5$ ) ***  | $190 \pm 8$<br>( $n=5$ ) **  | $-66.0 \pm 2.7$<br>( $n=5$ ) ****      | $-66.2 \pm 2.7$<br>( $n=5$ ) ***           | $8.1 \pm 1.2$<br>( $n=5$ )   |

**Supplementary Table 12. Summary of Effects of MTX on KCNQ2 channels.**

Statistics versus same channel in absence of MTX: \*\*\*\* $p < 0.0001$ , \*\*\* $p = 0.0009$ , \*\* $p = 0.005$ , \* $p = 0.01$ . Values indicate mean  $\pm$  SEM.

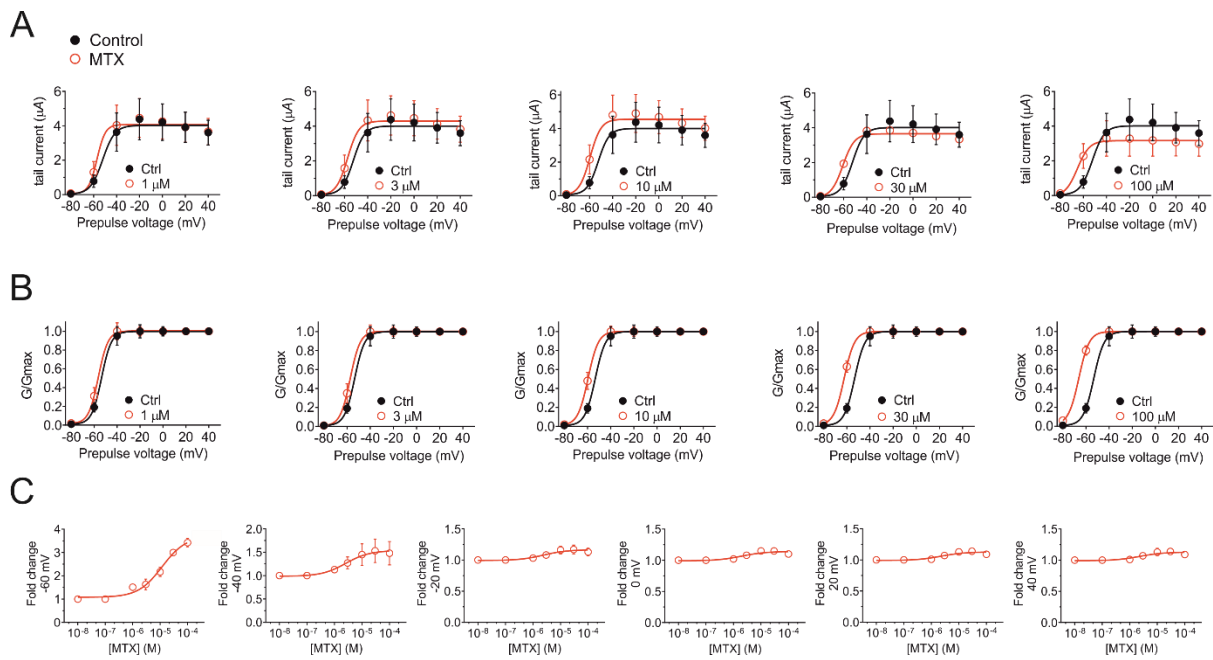

**Supplementary Figure 8. Effects of MTX on KCNQ3\* channels**

- A. Mean tail current versus prepulse voltage relationship for KCNQ3\* channels in the absence (black) and presence (red) of MTX,  $n = 5$ .
- B. Normalized tail current versus prepulse voltage relationships as in panel A,  $n = 5$ .
- C. Dose response of KCNQ3\* channels between  $-40$  and  $+40$  mV,  $n = 5$ . Error bars indicate SEM.

| KCNQ3*          | $\tau$ act, $-40$ mV (ms)    | $\tau$ deact, $-80$ mV (ms) | Normalized tail current $V_{0.5}$ (mV) | Non-normalized tail current $V_{0.5}$ (mV) | Slope (mV) |
|-----------------|------------------------------|-----------------------------|----------------------------------------|--------------------------------------------|------------|
| Ctrl            | $686 \pm 124$<br>( $n = 5$ ) | $373 \pm 70$<br>( $n = 5$ ) | $-53.6 \pm 2.3$<br>( $n = 5$ )         | $-53.1 \pm 8.5$<br>( $n = 5$ )             | n.d.       |
| 1 $\mu$ M MTX   | $552 \pm 98$<br>( $n = 5$ )  | $290 \pm 51$<br>( $n = 5$ ) | $-56.4 \pm 1.6$<br>( $n = 5$ )         | $-56.1 \pm 4.2$<br>( $n = 5$ )             | n.d.       |
| 3 $\mu$ M MTX   | $489 \pm 55$<br>( $n = 5$ )  | $263 \pm 29$<br>( $n = 5$ ) | $-57.3 \pm 1.4$<br>( $n = 5$ )         | $-57.4 \pm 5.3$<br>( $n = 5$ )             | n.d.       |
| 10 $\mu$ M MTX  | $421 \pm 26$<br>( $n = 5$ )  | $244 \pm 17$<br>( $n = 5$ ) | $-59.5 \pm 1.0$<br>( $n = 5$ )         | $-59.5 \pm 4.2$<br>( $n = 5$ )             | n.d.       |
| 30 $\mu$ M MTX  | $388 \pm 20$<br>( $n = 5$ )  | $240 \pm 18$<br>( $n = 5$ ) | $-62.3 \pm 1.2$<br>( $n = 5$ ) *       | $-62.1 \pm 3.9$<br>( $n = 5$ )             | n.d.       |
| 100 $\mu$ M MTX | $403 \pm 36$<br>( $n = 5$ )  | $269 \pm 30$<br>( $n = 5$ ) | $-66.2 \pm 2.1$<br>( $n = 5$ ) **      | $-65.2 \pm 3.9$<br>( $n = 5$ )             | n.d.       |

**Supplementary Table 13. Summary of Effects of MTX on KCNQ3\* channels.**

Statistics versus same channel in absence of MTX: \*\* $p=0.005$ , \* $p=0.01$ . Values indicate mean  $\pm$  SEM. n.d., not determined.

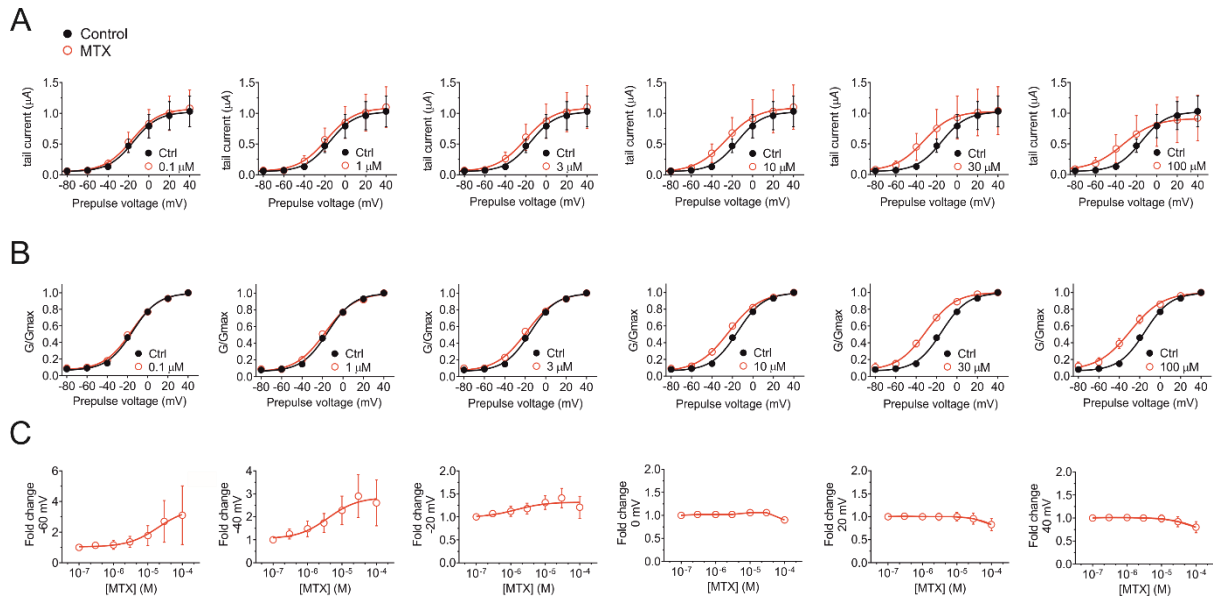

### Supplementary Figure 9. Effects of MTX on KCNQ4 channels

- A. Mean tail current versus prepulse voltage relationship for KCNQ4 channels in the absence (black) and presence (red) of MTX,  $n = 5$ .
- B. Normalized tail current versus prepulse voltage relationships as in panel A,  $n = 5$ .
- C. Dose response of KCNQ4 channels between  $-40$  and  $+40$  mV,  $n = 5$ . Error bars indicate SEM.

| KCNQ4           | $\tau$ act, $-40$ mV (ms)     | $\tau$ deact, $-80$ mV (ms)   | Normalized tail current $V_{0.5}$ (mV) | Non-normalized tail current $V_{0.5}$ (mV) | Slope (mV)                    |
|-----------------|-------------------------------|-------------------------------|----------------------------------------|--------------------------------------------|-------------------------------|
| Ctrl            | $1015 \pm 75$<br>( $n = 5$ )  | $1185 \pm 258$<br>( $n = 5$ ) | $-15.5 \pm 1.3$<br>( $n = 5$ )         | $-15.4 \pm 6.5$<br>( $n = 5$ )             | $12.6 \pm 1.2$<br>( $n = 5$ ) |
| 0.1 $\mu$ M MTX | $941 \pm 52$<br>( $n = 5$ )   | $924 \pm 223$<br>( $n = 5$ )  | $-17.0 \pm 1.6$<br>( $n = 5$ )         | $-17.1 \pm 8.1$<br>( $n = 5$ )             | $14.1 \pm 1.6$<br>( $n = 5$ ) |
| 1 $\mu$ M MTX   | $878 \pm 78$<br>( $n = 5$ )   | $891 \pm 234$<br>( $n = 5$ )  | $-18.1 \pm 1.9$<br>( $n = 5$ )         | $-18.1 \pm 9.0$<br>( $n = 5$ )             | $15.0 \pm 1.9$<br>( $n = 5$ ) |
| 3 $\mu$ M MTX   | $851 \pm 70$<br>( $n = 5$ )   | $861 \pm 240$<br>( $n = 5$ )  | $-20.1 \pm 1.3$<br>( $n = 5$ ) *       | $-20.5 \pm 9.8$<br>( $n = 5$ )             | $15.6 \pm 1.9$<br>( $n = 5$ ) |
| 10 $\mu$ M MTX  | $847 \pm 94$<br>( $n = 5$ )   | $906 \pm 293$<br>( $n = 5$ )  | $-25.6 \pm 1.9$<br>( $n = 5$ ) **      | $-25.3 \pm 9.7$<br>( $n = 5$ )             | $15.9 \pm 1.9$<br>( $n = 5$ ) |
| 30 $\mu$ M MTX  | $865 \pm 108$<br>( $n = 5$ )  | $905 \pm 283$<br>( $n = 5$ )  | $-32.1 \pm 1.9$<br>( $n = 5$ ) ***     | $-32.9 \pm 9.7$<br>( $n = 5$ )             | $14.4 \pm 1.8$<br>( $n = 5$ ) |
| 100 $\mu$ M MTX | $1092 \pm 170$<br>( $n = 5$ ) | $1197 \pm 446$<br>( $n = 5$ ) | $-31.5 \pm 1.3$<br>( $n = 5$ ) ****    | $-31.3 \pm 9.4$<br>( $n = 5$ )             | $16.4 \pm 3.2$<br>( $n = 5$ ) |

### Supplementary Table 14. Summary of Effects of MTX on KCNQ4 channels.

Statistics versus same channel in absence of MTX: \*\*\*\* $p < 0.0001$ , \*\*\* $p = 0.0009$ , \*\* $p = 0.005$ , \* $p = 0.01$ . Values indicate mean  $\pm$  SEM.

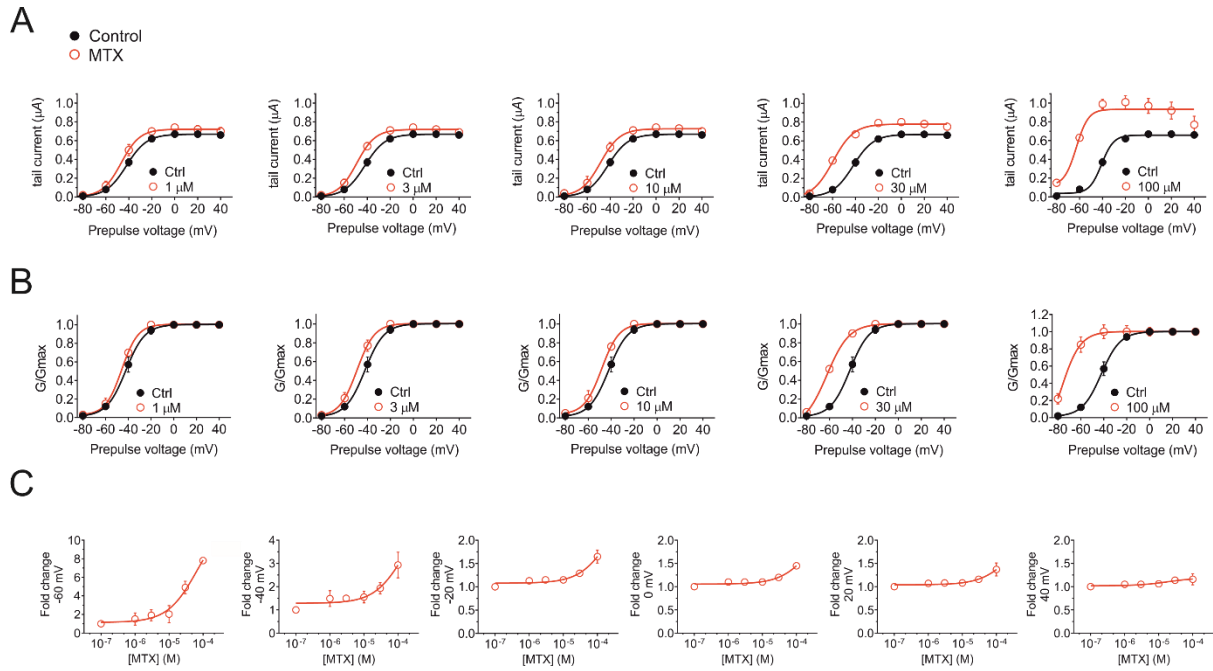

**Supplementary Figure 10. Effects of MTX on KCNQ5 channels**

- A. Mean tail current versus prepulse voltage relationship for KCNQ5 channels in the absence (black) and presence (red) of MTX,  $n = 5$ .  
 B. Normalized tail current versus prepulse voltage relationships as in panel A,  $n = 5$ .  
 C. Dose response of KCNQ5 channels between -40 and +40 mV,  $n = 5$ . Error bars indicate SEM.

| KCNQ5           | Normalized tail current $V_{0.5}$ (mV) | Non-normalized tail current $V_{0.5}$ (mV) | Slope (mV)                   |
|-----------------|----------------------------------------|--------------------------------------------|------------------------------|
| Ctrl            | $-42.4 \pm 1.6$<br>( $n = 5$ )         | $-41.9 \pm 1.0$<br>( $n = 5$ )             | $7.2 \pm 0.8$<br>( $n = 5$ ) |
| 1 $\mu$ M MTX   | $-49.9 \pm 2.1$<br>( $n = 5$ ) *       | $-49.3 \pm 1.2$<br>( $n = 5$ ) **          | $8.3 \pm 2.1$<br>( $n = 5$ ) |
| 3 $\mu$ M MTX   | $-51.1 \pm 2.3$<br>( $n = 5$ ) *       | $-51.7 \pm 1.8$<br>( $n = 5$ ) **          | $8.5 \pm 2.1$<br>( $n = 5$ ) |
| 10 $\mu$ M MTX  | $-51.5 \pm 3.2$<br>( $n = 5$ ) *       | $-51.9 \pm 0.8$<br>( $n = 5$ ) ****        | $8.6 \pm 2.9$<br>( $n = 5$ ) |
| 30 $\mu$ M MTX  | $-55.6 \pm 3.8$<br>( $n = 5$ ) *       | $-55.9 \pm 0.8$<br>( $n = 5$ ) ****        | $8.8 \pm 3.6$<br>( $n = 5$ ) |
| 100 $\mu$ M MTX | $-71.6 \pm 2.1$<br>( $n = 5$ ) ****    | $-71.1 \pm 2.6$<br>( $n = 5$ ) ***         | n.d.                         |

**Supplementary Table 15. Summary of Effects of MTX on KCNQ5 channels.**

Statistics versus same channel in absence of MTX: \*\*\*\* $p < 0.0001$ , \*\* $p = 0.005$ , \* $p = 0.01$ . Values indicate mean  $\pm$  SEM. n.d., not determined.

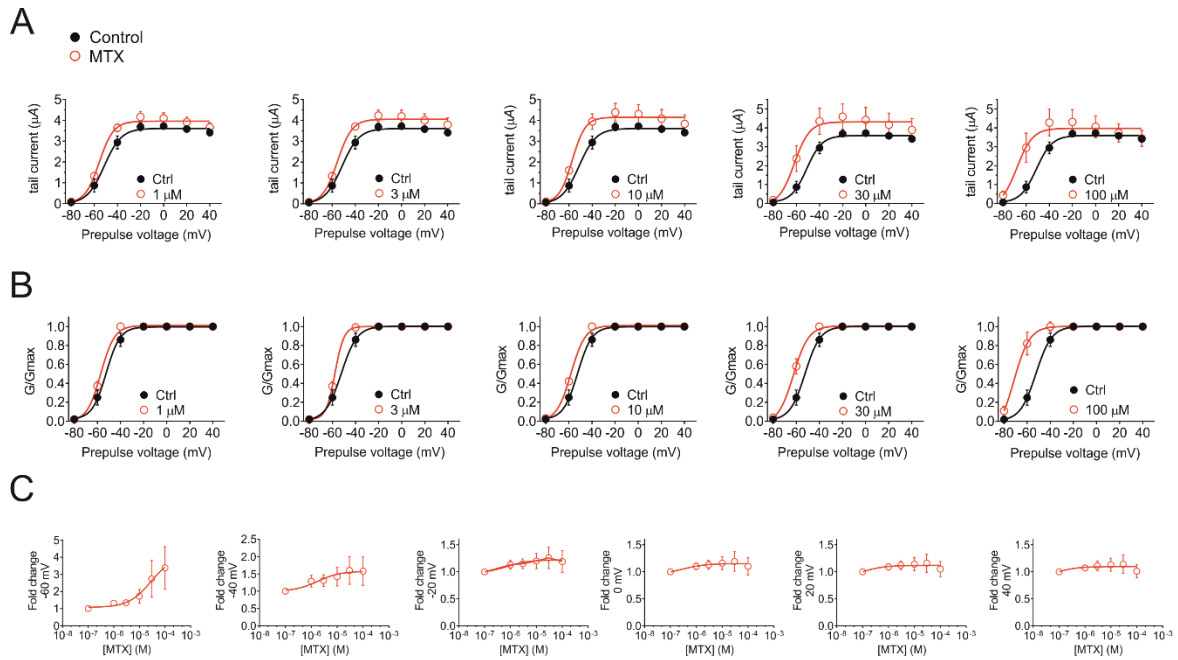

**Supplementary Figure 11. Effects of MTX on W236L-Q2/Q3 channels**

- A. Mean tail current versus prepulse voltage relationship for W236L-Q2/Q3 channels in the absence (black) and presence (red) of MTX,  $n = 3$ .  
 B. Normalized tail current versus prepulse voltage relationships as in panel A,  $n = 3$ .  
 C. Dose response of W236L-Q2/Q3 channels between -40 and +40 mV,  $n = 3$ . Error bars indicate SEM.

| W236L-Q2/Q3     | Normalized tail current $V_{0.5}$ (mV) | Non-normalized tail current $V_{0.5}$ (mV) | Slope (mV)                   |
|-----------------|----------------------------------------|--------------------------------------------|------------------------------|
| Ctrl            | $-52.4 \pm 1.3$<br>( $n = 3$ )         | $-51.2 \pm 2.5$<br>( $n = 3$ )             | $6.0 \pm 0.7$<br>( $n = 3$ ) |
| 1 $\mu$ M MTX   | $-57.1 \pm 0.9$<br>( $n = 3$ )         | $-55.7 \pm 1.9$<br>( $n = 3$ )             | $6.0 \pm 0.7$<br>( $n = 3$ ) |
| 3 $\mu$ M MTX   | $-57.8 \pm 1.3$<br>( $n = 3$ )         | $-55.4 \pm 2.1$<br>( $n = 3$ )             | $3.9 \pm 2.2$<br>( $n = 3$ ) |
| 10 $\mu$ M MTX  | $-58.1 \pm 0.9$<br>( $n = 3$ )         | $-57.3 \pm 2.7$<br>( $n = 3$ )             | $6.2 \pm 0.7$<br>( $n = 3$ ) |
| 30 $\mu$ M MTX  | $-62.4 \pm 1.3$<br>( $n = 3$ )         | $-61.9 \pm 3.9$<br>( $n = 3$ )             | $6.6 \pm 0.9$<br>( $n = 3$ ) |
| 100 $\mu$ M MTX | $-71.4 \pm 4.5$<br>( $n = 3$ )         | $-67.9 \pm 7.7$<br>( $n = 3$ )             | $6.8 \pm 1.2$<br>( $n = 3$ ) |

**Supplementary Table 16. Summary of Effects of MTX on W236L-Q2/Q3 channels.**

Statistics versus same channel in absence of MTX: \*\* $p=0.004$ , \* $p=0.03$ . Values indicate mean  $\pm$  SEM.

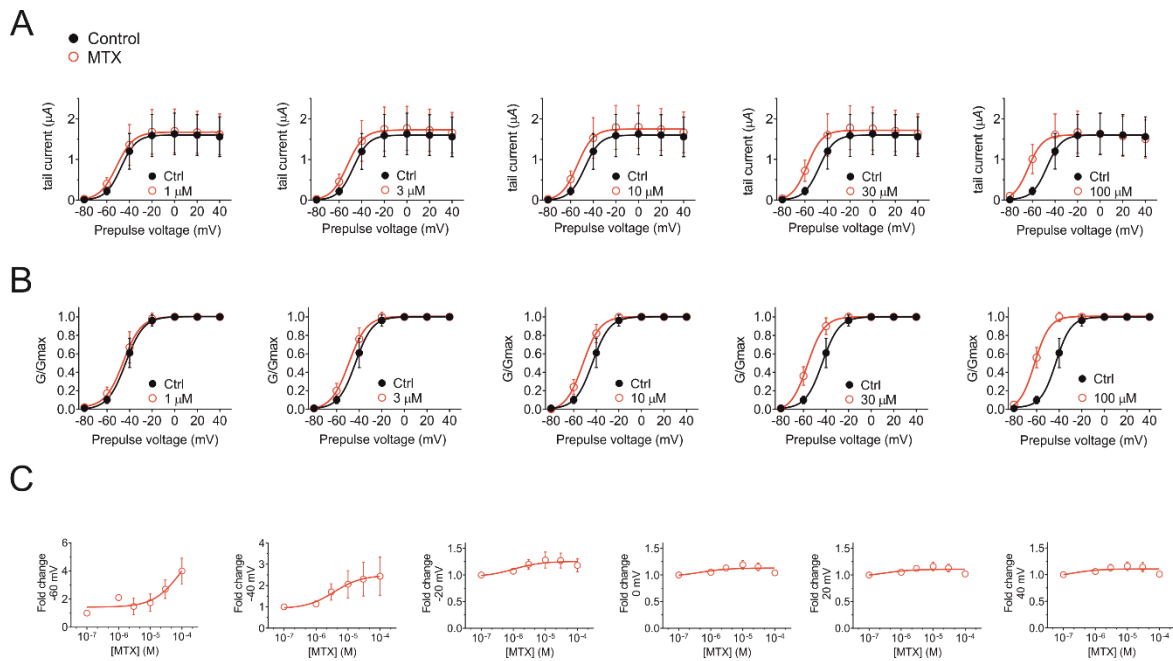

**Supplementary Figure 12. Effects of MTX on Q2/W265L-Q3 channels**

- A. Mean tail current versus prepulse voltage relationship for Q2/W265L-Q3 channels in the absence (black) and presence (red) of MTX,  $n = 3$ .
- B. Normalized tail current versus prepulse voltage relationships as in panel A,  $n = 3$ .
- C. Dose response of Q2/W265L-Q3 channels between -40 and +40 mV,  $n = 3$ . Error bars indicate SEM.

| Q2/W265L-Q3     | Normalized tail current $V_{0.5}$ (mV) | Non-normalized tail current $V_{0.5}$ (mV) | Slope (mV)                   |
|-----------------|----------------------------------------|--------------------------------------------|------------------------------|
| Ctrl            | $-43.5 \pm 2.7$<br>( $n = 3$ )         | $-47.5 \pm 10.9$<br>( $n = 3$ )            | $7.9 \pm 1.7$<br>( $n = 3$ ) |
| 1 $\mu$ M MTX   | $-45.7 \pm 2.9$<br>( $n = 3$ )         | $-51.3 \pm 11.3$<br>( $n = 3$ )            | $7.9 \pm 1.7$<br>( $n = 3$ ) |
| 3 $\mu$ M MTX   | $-49.2 \pm 2.6$<br>( $n = 3$ )         | $-52.7 \pm 10.5$<br>( $n = 3$ )            | $7.9 \pm 1.8$<br>( $n = 3$ ) |
| 10 $\mu$ M MTX  | $-51.8 \pm 2.4$<br>( $n = 3$ )         | $-54.0 \pm 9.7$<br>( $n = 3$ )             | $7.6 \pm 1.4$<br>( $n = 3$ ) |
| 30 $\mu$ M MTX  | $-56.3 \pm 2.2$<br>( $n = 3$ )         | $-58.0 \pm 8.3$<br>( $n = 3$ )             | $7.4 \pm 1.6$<br>( $n = 3$ ) |
| 100 $\mu$ M MTX | $-61.8 \pm 2.2$<br>( $n = 3$ )         | $-63.7 \pm 11.2$<br>( $n = 3$ )            | $6.6 \pm 2.1$<br>( $n = 3$ ) |

**Supplementary Table 17. Summary of Effects of MTX on Q2/W265L-Q3 channels.**

Statistics versus same channel in absence of MTX: \*\* $p=0.004$ , \* $p=0.03$ . Values indicate mean  $\pm$  SEM.



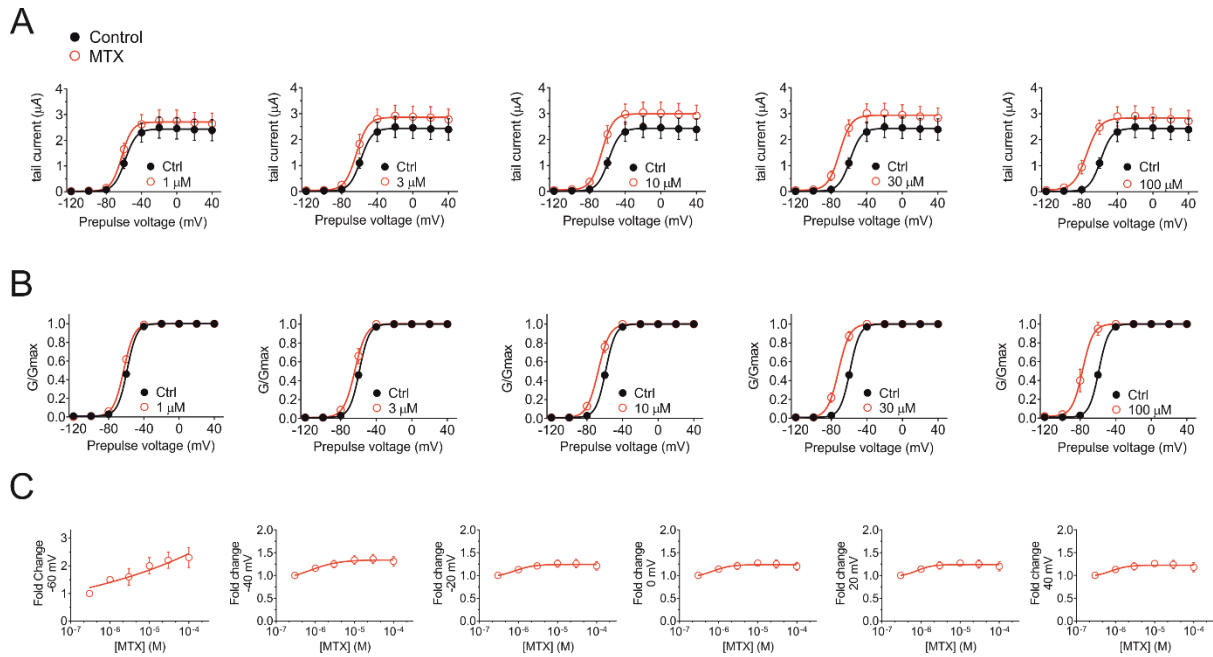

**Supplementary Figure 13. Effects of MTX on W236L-Q2/W265L-Q3 channels**

- A. Mean tail current versus prepulse voltage relationship for W236L-Q2/W265L-Q3 channels in the absence (black) and presence (red) of MTX,  $n = 5$ .  
 B. Normalized tail current versus prepulse voltage relationships as in panel A,  $n = 5$ .  
 C. Dose response of W236L-Q2/W265L-Q3 channels between -40 and +40 mV,  $n = 5$ . Error bars indicate SEM.

| W236L-Q2/<br>W265L-Q3 | Normalized<br>tail current $V_{0.5}$<br>(mV) | Non-normalized<br>tail current $V_{0.5}$<br>(mV) | Slope<br>(mV)                |
|-----------------------|----------------------------------------------|--------------------------------------------------|------------------------------|
| Ctrl                  | $-59.0 \pm 0.2$<br>( $n = 5$ )               | $-58.7 \pm 3.4$<br>( $n = 5$ )                   | $5.5 \pm 0.4$<br>( $n = 5$ ) |
| 1 $\mu$ M MTX         | $-62.8 \pm 0.4$<br>( $n = 5$ )               | $-62.5 \pm 3.4$<br>( $n = 5$ )                   | $5.9 \pm 0.5$<br>( $n = 5$ ) |
| 3 $\mu$ M MTX         | $-64.1 \pm 0.9$<br>( $n = 5$ )               | $-63.6 \pm 3.7$<br>( $n = 5$ )                   | $6.3 \pm 0.9$<br>( $n = 5$ ) |
| 10 $\mu$ M MTX        | $-67.3 \pm 0.9$<br>( $n = 5$ )               | $-66.3 \pm 3.9$<br>( $n = 5$ )                   | $6.4 \pm 0.6$<br>( $n = 5$ ) |
| 30 $\mu$ M MTX        | $-71.9 \pm 0.9$<br>( $n = 5$ )               | $-70.6 \pm 3.7$<br>( $n = 5$ )                   | $6.3 \pm 0.5$<br>( $n = 5$ ) |
| 100 $\mu$ M MTX       | $-77.3 \pm 1.4$<br>( $n = 5$ )               | $-74.4 \pm 3.9$<br>( $n = 5$ )                   | $5.9 \pm 1.8$<br>( $n = 5$ ) |

**Supplementary Table 18. Summary of Effects of MTX on KCNQ2-W236L/KCNQ3-W265L channels.**

Statistics versus same channel in absence of MTX: \*\* $p=0.004$ , \* $p=0.03$ . Values indicate mean  $\pm$  SEM.

| KCNQ2/3                             | Normalized tail current $V_{0.5}$ (mV) | Non-normalized tail current $V_{0.5}$ (mV) |
|-------------------------------------|----------------------------------------|--------------------------------------------|
| Ctrl                                | $-47.7 \pm 1.6$<br>(n =6)              | $-47.8 \pm 4.0$<br>(n =6)                  |
| 100 $\mu$ M GABOB<br>30 $\mu$ M MTX | $-59.7 \pm 1.8$<br>(n =6) ***          | $-60.8 \pm 4.5$<br>(n =6)                  |

**Supplementary Table 19. Summary of effects of GABOB on MTX sensitivity of KCNQ2/3 channels.**

Statistics versus same channel in absence of 100  $\mu$ M GABOB and 30  $\mu$ M MTX: \*\*\*p=0.0007.

| W236L-Q2/<br>W265L-Q3 | Normalized tail current $V_{0.5}$ (mV) | Non-normalized tail current $V_{0.5}$ (mV) |
|-----------------------|----------------------------------------|--------------------------------------------|
| Ctrl                  | $-51.9 \pm 3.2$<br>(n =9)              | $-53.4 \pm 0.8$<br>(n =9)                  |
| 100 $\mu$ M 2-MP      | $-51.0 \pm 4.2$<br>(n =9)              | $-53.8 \pm 1.7$<br>(n =9)                  |

**Supplementary Table 20. Summary of effects of 2-mercaptophenol on KCNQ2-W236L/KCNQ3-W265L channels.**

| KCNQ2/3                            | Normalized tail current $V_{0.5}$ (mV) | Non-normalized tail current $V_{0.5}$ (mV) |
|------------------------------------|----------------------------------------|--------------------------------------------|
| Ctrl                               | $-40.5 \pm 0.7$<br>(n =9)              | $-41.1 \pm 3.0$<br>(n =9)                  |
| 100 $\mu$ M 2-MP<br>30 $\mu$ M MTX | $-51.8 \pm 1.7$<br>(n =9) ****         | $-52.0 \pm 4.7$<br>(n =9) ****             |

**Supplementary Table 21. Summary of effects of 2-mercaptophenol on MTX sensitivity of KCNQ2/3 channels.**

Statistics versus same channel in absence of 100  $\mu$ M 2-mercaptophenol and 30  $\mu$ M MTX: \*\*\*\*p<0.0001.

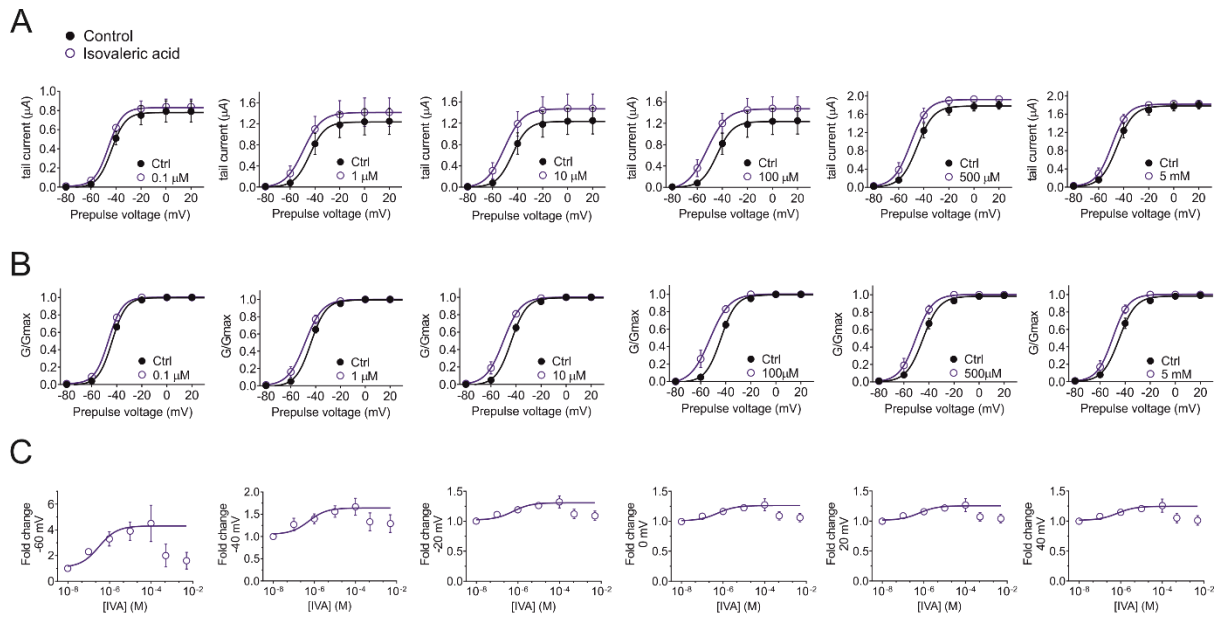

**Supplementary Figure 14. Effects of Isovaleric acid on KCNQ2 channels**

- A. Mean tail current versus prepulse voltage relationship for KCNQ2 channels in the absence (black) and presence (blue) of Isovaleric acid,  $n = 4-6$ .  
 B. Normalized tail current versus prepulse voltage relationships as in panel A,  $n = 4-6$ .  
 C. Dose response of KCNQ2 channels between  $-40$  and  $+40$  mV,  $n = 4-6$ . Error bars indicate SEM.

| KCNQ2                            | Normalized tail current $V_{0.5}$ (mV) | Non-normalized tail current $V_{0.5}$ (mV) | Slope (mV)                   |
|----------------------------------|----------------------------------------|--------------------------------------------|------------------------------|
| Ctrl                             | $-43.7 \pm 0.6$<br>( $n = 6$ )         | $-43.6 \pm 4.0$<br>( $n = 6$ )             | $5.5 \pm 0.6$<br>( $n = 6$ ) |
| <b>0.1 <math>\mu</math>M IVA</b> | $-46.6 \pm 0.9$<br>( $n = 4$ ) *       | $-45.9 \pm 3.1$<br>( $n = 4$ )             | $5.5 \pm 0.9$<br>( $n = 4$ ) |
| <b>1 <math>\mu</math>M IVA</b>   | $-48.5 \pm 1.3$<br>( $n = 4$ ) *       | $-49.3 \pm 6.9$<br>( $n = 4$ )             | $7.0 \pm 0.8$<br>( $n = 4$ ) |
| <b>10 <math>\mu</math>M IVA</b>  | $-50.1 \pm 1.2$<br>( $n = 4$ ) **      | $-50.7 \pm 6.5$<br>( $n = 4$ )             | $6.9 \pm 0.8$<br>( $n = 4$ ) |
| <b>100 <math>\mu</math>M IVA</b> | $-52.6 \pm 1.8$<br>( $n = 4$ ) *       | $-52.2 \pm 5.6$<br>( $n = 4$ )             | $7.8 \pm 1.8$<br>( $n = 4$ ) |
| <b>500 <math>\mu</math>M IVA</b> | $-50.4 \pm 1.5$<br>( $n = 4$ ) *       | $-50.4 \pm 2.1$<br>( $n = 4$ )             | $6.6 \pm 0.9$<br>( $n = 4$ ) |
| <b>5 mM IVA</b>                  | $-49.9 \pm 1.4$<br>( $n = 4$ ) *       | $-49.5 \pm 1.4$<br>( $n = 4$ )             | $6.3 \pm 0.8$<br>( $n = 4$ ) |

**Supplementary Table 22. Summary of Effects of IVA on KCNQ2 channels.**

Statistics versus same channel in absence of IVA: \*\* $p=0.006$ , \* $p=0.04$ . Values indicate mean  $\pm$  SEM.

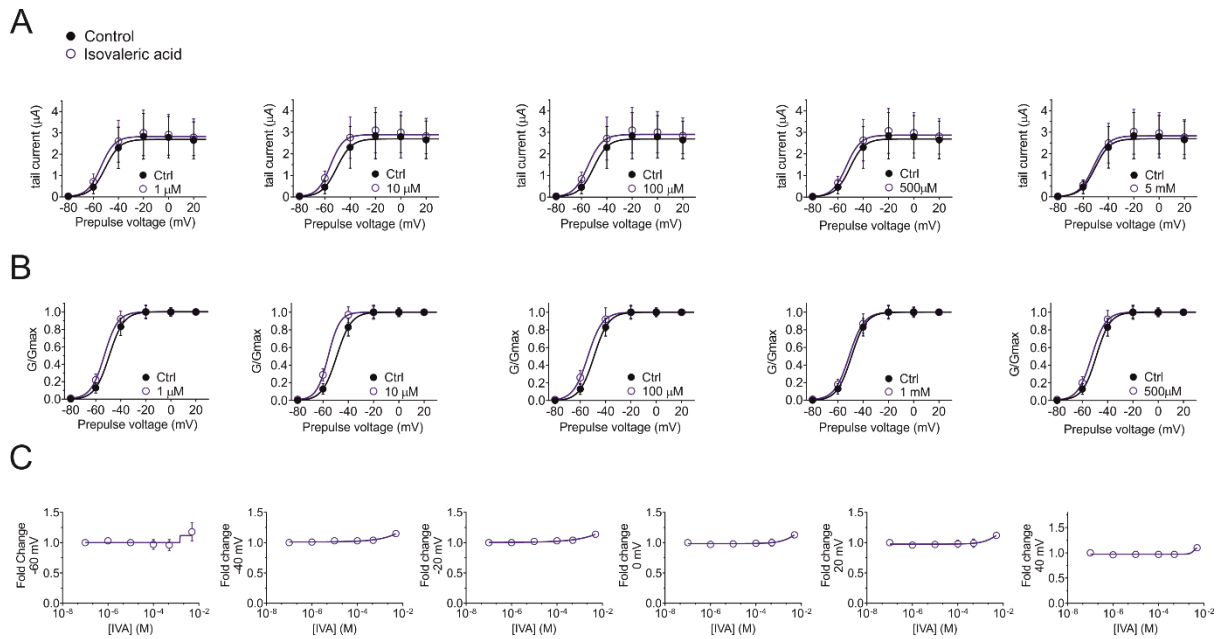

**Supplementary Figure 15. Effects of Isovaleric acid on KCNQ3\* channels**

- A. Mean tail current versus prepulse voltage relationship for KCNQ3\* channels in the absence (black) and presence (blue) of Isovaleric acid,  $n = 4$ .  
 B. Normalized tail current versus prepulse voltage relationships as in panel A,  $n = 4$ .  
 C. Dose response of KCNQ3\* channels between -40 and +40 mV,  $n = 4$ . Error bars indicate SEM.

| KCNQ3*          | Normalized tail current $V_{0.5}$ (mV) | Non-normalized tail current $V_{0.5}$ (mV) | Slope (mV) |
|-----------------|----------------------------------------|--------------------------------------------|------------|
| Ctrl            | $-49.2 \pm 2.2$<br>( $n = 4$ )         | $-50.6 \pm 1.6$<br>( $n = 4$ )             | n.d.       |
| 1 $\mu$ M IVA   | $-53.1 \pm 2.1$<br>( $n = 4$ )         | $-53.9 \pm 1.3$<br>( $n = 4$ )             | n.d.       |
| 10 $\mu$ M IVA  | $-55.8 \pm 2.2$<br>( $n = 4$ )         | $-55.6 \pm 1.5$<br>( $n = 4$ )             | n.d.       |
| 100 $\mu$ M IVA | $-53.9 \pm 2.2$<br>( $n = 4$ )         | $-54.8 \pm 0.9$<br>( $n = 4$ )             | n.d.       |
| 500 $\mu$ M IVA | $-52.6 \pm 2.1$<br>( $n = 4$ )         | $-53.3 \pm 1.7$<br>( $n = 4$ )             | n.d.       |
| 5 mM IVA        | $-51.0 \pm 2.3$<br>( $n = 4$ )         | $-51.7 \pm 1.5$<br>( $n = 4$ )             | n.d.       |

**Supplementary Table 23. Summary of Effects of IVA on KCNQ3\* channels.**

Statistics versus same channel in absence of IVA: \*\* $p=0.007$ , \* $p=0.01$ . Values indicate mean  $\pm$  SEM. n.d., not determined.

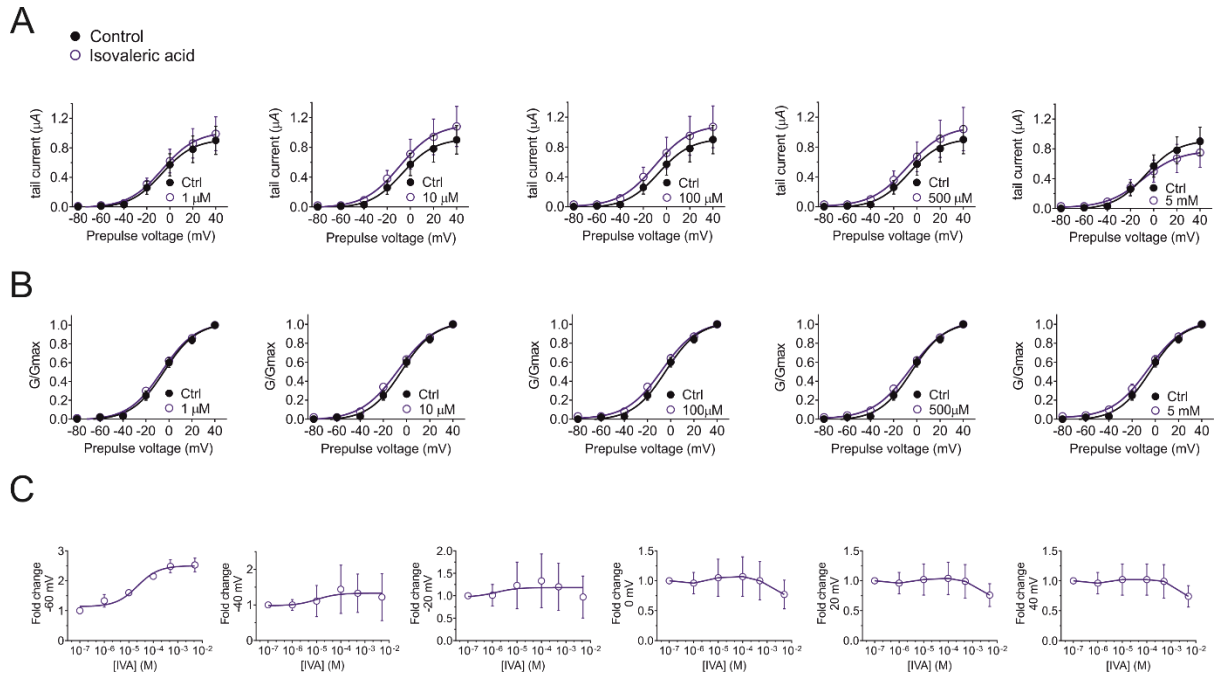

**Supplementary Figure 16. Effects of Isovaleric acid on KCNQ4 channels**

- A. Mean tail current versus prepulse voltage relationship for KCNQ4 channels in the absence (black) and presence (blue) of Isovaleric acid,  $n = 4$ .  
 B. Normalized tail current versus prepulse voltage relationships as in panel A,  $n = 4$ .  
 C. Dose response of KCNQ4 channels between -40 and +40 mV,  $n = 4$ . Error bars indicate SEM.

| KCNQ4           | Normalized tail current $V_{0.5}$ (mV) | Non-normalized tail current $V_{0.5}$ (mV) | Slope (mV)                    |
|-----------------|----------------------------------------|--------------------------------------------|-------------------------------|
| Ctrl            | $-4.3 \pm 2.2$<br>( $n = 4$ )          | $-6.9 \pm 8.2$<br>( $n = 4$ )              | $14.1 \pm 2.0$<br>( $n = 4$ ) |
| 1 $\mu$ M IVA   | $-6.2 \pm 1.4$<br>( $n = 4$ )          | $-6.7 \pm 9.1$<br>( $n = 4$ )              | $14.6 \pm 1.4$<br>( $n = 4$ ) |
| 10 $\mu$ M IVA  | $-7.2 \pm 1.6$<br>( $n = 4$ )          | $-9.1 \pm 10.4$<br>( $n = 4$ )             | $16.2 \pm 1.5$<br>( $n = 4$ ) |
| 100 $\mu$ M IVA | $-7.5 \pm 1.8$<br>( $n = 4$ )          | $-10.2 \pm 11.1$<br>( $n = 4$ )            | $15.3 \pm 1.8$<br>( $n = 4$ ) |
| 500 $\mu$ M IVA | $-7.5 \pm 5.7$<br>( $n = 4$ )          | $-7.8 \pm 11.9$<br>( $n = 4$ )             | $16.2 \pm 1.6$<br>( $n = 4$ ) |
| 5 mM IVA        | $-6.1 \pm 2.1$<br>( $n = 4$ )          | $-9.3 \pm 12.1$<br>( $n = 4$ )             | $15.6 \pm 1.9$<br>( $n = 4$ ) |

**Supplementary Table 24. Summary of Effects of IVA on KCNQ4 channels.**

Values indicate mean  $\pm$  SEM.

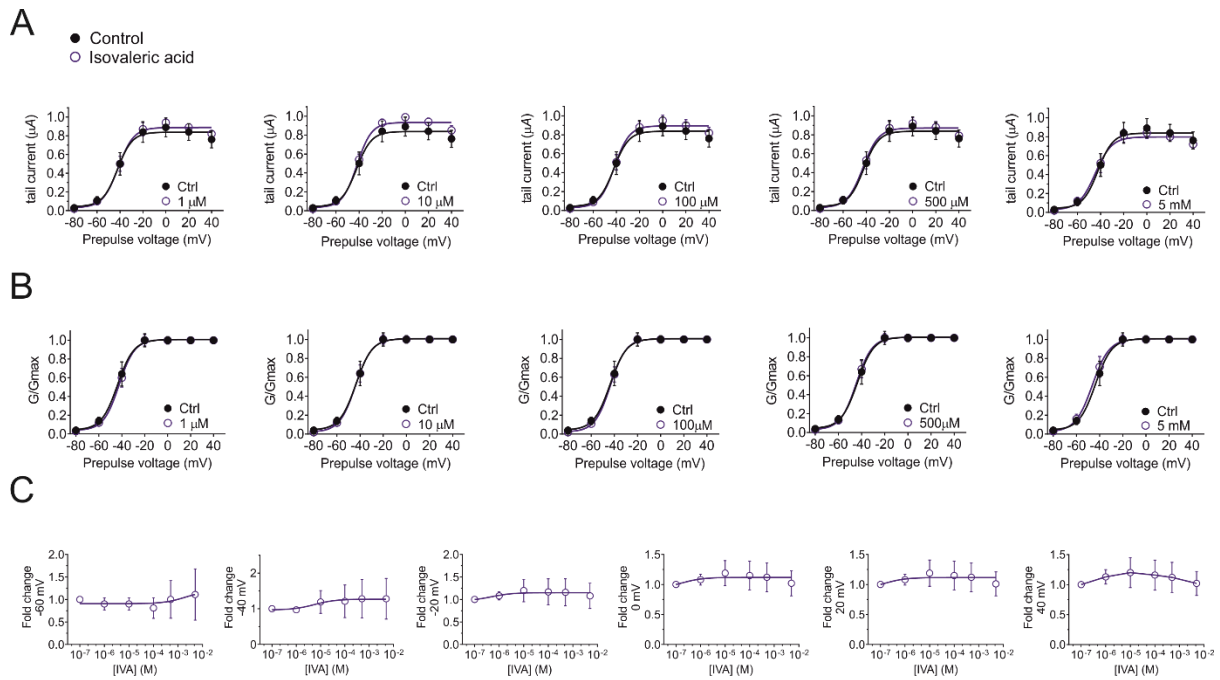

**Supplementary Figure 17. Effects of Isovaleric acid on KCNQ5 channels**

- A. Mean tail current versus prepulse voltage relationship for KCNQ5 channels in the absence (black) and presence (blue) of Isovaleric acid,  $n = 4$ .  
 B. Normalized tail current versus prepulse voltage relationships as in panel A,  $n = 4$ .  
 C. Dose response of KCNQ5 channels between -40 and +40 mV,  $n = 4$ . Error bars indicate SEM.

| KCNQ5           | Normalized tail current $V_{0.5}$ (mV) | Non-normalized tail current $V_{0.5}$ (mV) | Slope (mV)                   |
|-----------------|----------------------------------------|--------------------------------------------|------------------------------|
| Ctrl            | $-43.7 \pm 2.4$<br>( $n = 4$ )         | $-42.2 \pm 3.8$<br>( $n = 4$ )             | $7.1 \pm 2.4$<br>( $n = 4$ ) |
| 1 $\mu$ M IVA   | $-42.4 \pm 1.7$<br>( $n = 4$ )         | $-41.5 \pm 1.9$<br>( $n = 4$ )             | $6.8 \pm 2.1$<br>( $n = 4$ ) |
| 10 $\mu$ M IVA  | $-43.8 \pm 1.7$<br>( $n = 4$ )         | $-41.8 \pm 1.6$<br>( $n = 4$ )             | $6.9 \pm 1.7$<br>( $n = 4$ ) |
| 100 $\mu$ M IVA | $-43.4 \pm 1.4$<br>( $n = 4$ )         | $-41.6 \pm 2.1$<br>( $n = 4$ )             | $6.7 \pm 1.5$<br>( $n = 4$ ) |
| 500 $\mu$ M IVA | $-44.6 \pm 1.8$<br>( $n = 4$ )         | $-42.9 \pm 2.7$<br>( $n = 4$ )             | $6.9 \pm 1.6$<br>( $n = 4$ ) |
| 5 mM IVA        | $-46.3 \pm 2.1$<br>( $n = 4$ )         | $-44.6 \pm 3.2$<br>( $n = 4$ )             | $7.3 \pm 1.6$<br>( $n = 4$ ) |

**Supplementary Table 25. Summary of Effects of IVA on KCNQ5 channels.**

Statistics versus same channel in absence of IVA: \*\*\*\* $p < 0.0001$ , \*\*\* $p = 0.0009$ , \*\* $p = 0.005$ , \* $p = 0.01$ . Values indicate mean  $\pm$  SEM.

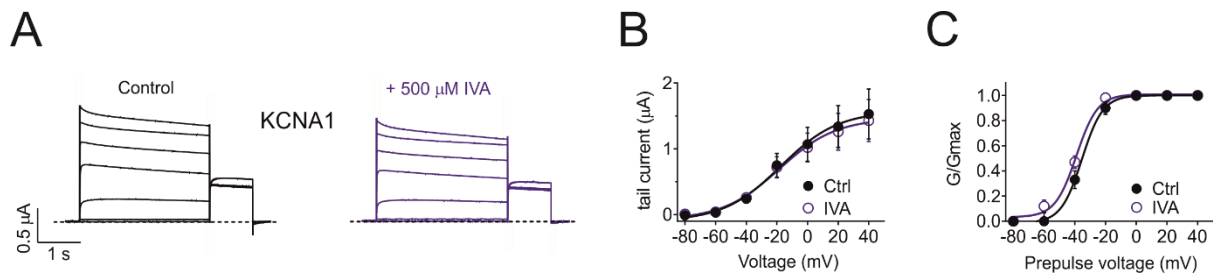

**Supplementary Figure 18. Effects of Isovaleric acid on KCNA1 channels**

- A. Averaged KCNA1 traces in the absence (black) and presence (blue) of Isovaleric acid (500 μM),  $n = 6$ .
- B. Mean tail current versus prepulse voltage as in panel A,  $n = 6$ .
- C. Normalized tail current versus prepulse voltage relationships as in panel A,  $n = 6$ .

| KCNQ2/3    | Normalized tail current $V_{0.5}$ (mV) | Non-normalized tail current $V_{0.5}$ (mV) | Slope (mV)                   |
|------------|----------------------------------------|--------------------------------------------|------------------------------|
| Ctrl       | $-35.3 \pm 1.5$<br>( $n = 6$ )         | $-37.5 \pm 2.4$<br>( $n = 6$ )             | $6.8 \pm 1.3$<br>( $n = 6$ ) |
| 500 μM IVA | $-38.9 \pm 1.1$<br>( $n = 6$ )         | $-37.8 \pm 3.2$<br>( $n = 6$ )             | $6.9 \pm 1.1$<br>( $n = 6$ ) |

**Supplementary Table 26. Summary of Effects of Isovaleric acid on KCNA1 channels.**

Values indicate mean  $\pm$  SEM.

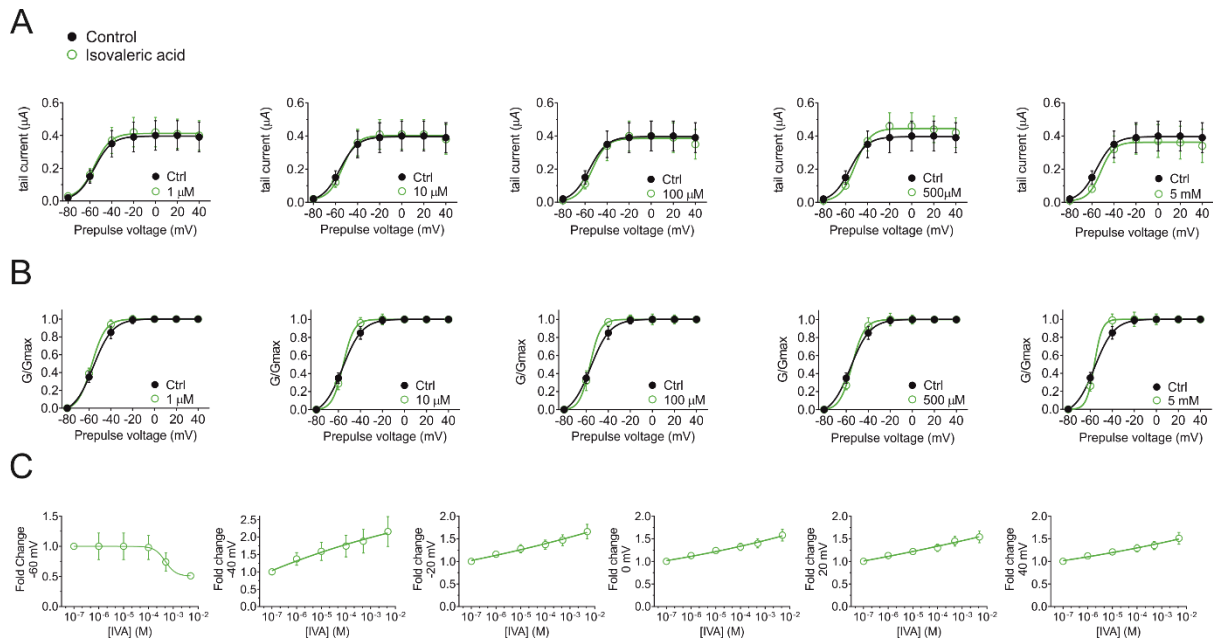

**Supplementary Figure 19. Effects of Isovaleric acid on W236L-Q2/W265L-Q3 channels**

- A. Mean tail current versus prepulse voltage relationship for W236L-Q2/W265L-Q3 channels in the absence (black) and presence (green) of Isovaleric acid,  $n = 3-6$ .
- B. Normalized tail current versus prepulse voltage relationships as in panel A,  $n = 3-6$ .
- C. Dose response of W236L-Q2/W265L-Q3 channels between  $-40$  and  $+40$  mV,  $n = 3-6$ . Error bars indicate SEM.

| W236L-Q2/<br>W265L-Q3 | Normalized<br>tail current $V_{0.5}$<br>(mV) | Non-normalized<br>tail current $V_{0.5}$<br>(mV) | Slope<br>(mV)              |
|-----------------------|----------------------------------------------|--------------------------------------------------|----------------------------|
| Ctrl                  | $-56.0 \pm 1.9$<br>( $n=6$ )                 | $-55.9 \pm 8.3$<br>( $n=6$ )                     | $8.8 \pm 1.6$<br>( $n=6$ ) |
| 1 $\mu$ M IVA         | $-57.6 \pm 1.1$<br>( $n=6$ )                 | $-55.8 \pm 7.5$<br>( $n=6$ )                     | $6.3 \pm 1.4$<br>( $n=6$ ) |
| 10 $\mu$ M IVA        | $-55.7 \pm 1.7$<br>( $n=6$ )                 | $-53.7 \pm 7.4$<br>( $n=6$ )                     | $4.9 \pm 1.6$<br>( $n=6$ ) |
| 100 $\mu$ M IVA       | $-56.5 \pm 2.0$<br>( $n=6$ )                 | $-53.7 \pm 7.7$<br>( $n=6$ )                     | $4.7 \pm 2.4$<br>( $n=6$ ) |
| 500 $\mu$ M IVA       | $-54.6 \pm 1.8$<br>( $n=4$ )                 | $-51.1 \pm 6.1$<br>( $n=4$ )                     | $5.6 \pm 1.4$<br>( $n=4$ ) |
| 5 mM IVA              | $-56.3 \pm 3.7$<br>( $n=3$ )                 | $-51.9 \pm 8.4$<br>( $n=3$ )                     | $3.5 \pm 3.5$<br>( $n=3$ ) |

**Supplementary Table 27. Summary of Effects of IVA on W236L-Q2/W265L-Q3 channels.**

Values indicate mean  $\pm$  SEM.



|                       | MTX EC <sub>50</sub> (μM) | IVA EC <sub>50</sub> (μM) |
|-----------------------|---------------------------|---------------------------|
| KCNQ2                 | 6.4 ± 0.21<br>(n =5-10)   | 0.34 ± 0.6<br>(n =4-6)    |
| KCNQ3*                | 13 ± 0.15<br>(n =5)       | 0.5 ± 1.5<br>(n =5)       |
| KCNQ4                 | 20.2 ± 0.9<br>(n =5)      | 16.2 ± 0.3<br>(n =4)      |
| KCNQ5                 | 67.1 ± 0.27<br>(n =5)     | 1939 ± 4.7<br>(n =4)      |
| KCNQ2/3               | 11.5 ± 0.2<br>(n =5-9)    | 228 ± 0.4<br>(n =4)       |
| W236L-Q2/Q3           | 27 ± 0.6<br>(n =3)        | n.d.                      |
| Q2/W265L-Q3           | 70 ± 0.6<br>(n =3)        | n.d.                      |
| W236L-Q2/<br>W265L-Q3 | n.d.                      | n.d.                      |

**Supplementary Table 28. EC<sub>50</sub> (μM) values calculated from dose responses.**

Values indicate mean ± SEM. n.d., not determined.

|                       | MTX V <sub>0.5</sub><br>EC <sub>50</sub> (μM) |
|-----------------------|-----------------------------------------------|
| KCNQ2/3               | 4.0 ± 0.2<br>(n =5-9)                         |
| W236L-Q2/Q3           | 37.3 ± 0.2<br>(n =5)                          |
| Q2/W265L-Q3           | 13.7 ± 0.3<br>(n =5)                          |
| W236L-Q2/<br>W265L-Q3 | 14.9 ± 0.1<br>(n =6)                          |

**Supplementary Table 29. MTX EC<sub>50</sub> (μM) values calculated from shift in V<sub>0.5</sub>.**

Values indicate mean ± SEM. IVA values not calculated because double mutant eliminates sensitivity.

| KCNQ2                      | Normalized<br>tail current V <sub>0.5</sub><br>(mV) | Non-normalized<br>tail current V <sub>0.5</sub><br>(mV) |
|----------------------------|-----------------------------------------------------|---------------------------------------------------------|
| Ctrl                       | -35.7 ± 1.4<br>(n =5)                               | -33.5 ± 4.5<br>(n =5)                                   |
| 100 μM IVA<br>100 μM GABOB | -41.2 ± 1.3<br>(n =5) *                             | -39.9 ± 3.5<br>(n =5)                                   |

**Supplementary Table 30. Summary of effects of GABOB on IVA sensitivity of KCNQ2 channels.**

Statistics versus same channel in absence of 100 μM GABOB and 100 μM IVA: \*p=0.05.

| KCNQ2/3                           | Normalized tail current $V_{0.5}$ (mV) | Non-normalized tail current $V_{0.5}$ (mV) |
|-----------------------------------|----------------------------------------|--------------------------------------------|
| Ctrl                              | -41.2 ± 0.6<br>(n = 5)                 | -40.2 ± 2.9<br>(n = 5)                     |
| 30 $\mu$ M MTX<br>500 $\mu$ M IVA | -63.9 ± 1.5<br>(n = 5) ****            | -60.3 ± 2.8<br>(n = 5) **                  |

**Supplementary Table 31. Summary of Effects of MTX and IVA on KCNQ2/3 channels.**

Statistics versus same channel in absence of MTX and IVA: \*\*\*\* $p < 0.0001$ , \*\* $p = 0.001$

| KCNQ2/3  | $\tau$ act, -60 mV (ms) | $\tau$ act, -40 mV (ms) | $\tau$ act, -20 mV (ms) |
|----------|-------------------------|-------------------------|-------------------------|
| Ctrl     | 1305 ± 149<br>(n = 8)   | 665 ± 48<br>(n = 8)     | 248 ± 16<br>(n = 8)     |
| Cocktail | 752 ± 59<br>(n = 8) **  | 384 ± 53<br>(n = 8) **  | 188 ± 12<br>(n = 8) *   |

**Supplementary Table 32. Summary of effects of cocktail on KCNQ2/3 channel activation kinetics.**

Statistics versus same channel in absence of cocktail: \*\* $p = 0.007$ , \* $p = 0.01$ .

| KCNQ2/3  | $\tau$ deact, -120 mV (ms) | $\tau$ deact, -110 mV (ms) | $\tau$ deact, -100 mV (ms) | $\tau$ deact, -90 mV (ms) | $\tau$ deact, -80 mV (ms) |
|----------|----------------------------|----------------------------|----------------------------|---------------------------|---------------------------|
| Ctrl     | 13 ± 1.0<br>(n = 5)        | 18 ± 1.0<br>(n = 5)        | 25 ± 1.0<br>(n = 5)        | 36 ± 1.6<br>(n = 5)       | 52 ± 3.4<br>(n = 5)       |
| Cocktail | 27 ± 2.3<br>(n = 5) **     | 38 ± 3.4<br>(n = 5) **     | 54 ± 5.0<br>(n = 5) **     | 77 ± 7.1<br>(n = 5) **    | 92 ± 4.7<br>(n = 5) ***   |

**Supplementary Table 33. Summary of effects of cocktail on KCNQ2/3 channel deactivation kinetics.**

Statistics versus same channel in absence of cocktail: \*\*\* $p = 0.0003$ , \*\* $p = 0.002$ .

| KCNQ2/3                                                    | Normalized tail current $V_{0.5}$ (mV) | Non-normalized tail current $V_{0.5}$ (mV) | Slope (mV)            |
|------------------------------------------------------------|----------------------------------------|--------------------------------------------|-----------------------|
| Ctrl                                                       | -48.0 ± 0.7<br>(n = 31)                | -47.6 ± 2.2<br>(n = 31)                    | 7.5 ± 0.8<br>(n = 31) |
| 10 $\mu$ M Retigabine                                      | -61.4 ± 1.1<br>(n = 9) ****            | -61.8 ± 4.8<br>(n = 9) *                   | 6.7 ± 1.1<br>(n = 9)  |
| 10 $\mu$ M Retigabine<br>500 $\mu$ M IVA                   | -79.8 ± 0.9<br>(n = 6) ****            | -79.8 ± 0.9<br>(n = 6) ****                | 7.5 ± 1.2<br>(n = 6)  |
| 10 $\mu$ M Retigabine<br>30 $\mu$ M MTX                    | -104.6 ± 1.5<br>(n = 6) ****           | -100.9 ± 5.9<br>(n = 6) ***                | 7.3 ± 1.2<br>(n = 6)  |
| 10 $\mu$ M Retigabine<br>30 $\mu$ M MTX<br>500 $\mu$ M IVA | n.d.<br>(n = 8)                        | n.d.<br>(n = 8)                            | n.d.<br>(n = 8)       |

**Supplementary Table 34. Summary of Effects of MTX, IVA and retigabine combinations on KCNQ2/3 channels.**

Statistics versus same channel in absence of MTX and IVA: \*\*\*\* $p < 0.0001$ , \*\*\* $p = 0.0003$ , \* $p = 0.02$ . Values indicate mean ± SEM. n.d., not determined.

| KCNQ2/3                                   | Normalized tail current $V_{0.5}$ (mV) | Non-normalized tail current $V_{0.5}$ (mV) |
|-------------------------------------------|----------------------------------------|--------------------------------------------|
| Ctrl                                      | -38.7 ± 0.7<br>(n = 13)                | -37.9 ± 2.2<br>(n = 13)                    |
| 1 μM Retigabine                           | -41.9 ± 0.7<br>(n = 8) *               | -41.7 ± 2.3<br>(n = 8)                     |
| 1 μM Retigabine<br>1 μM MTX<br>1 μM IVA   | -54.3 ± 1.6<br>(n = 8) ****            | -49.8 ± 4.7<br>(n = 8) *                   |
| 1 μM Retigabine<br>10 μM MTX<br>10 μM IVA | -57.8 ± 0.9<br>(n = 8) ****            | -55.9 ± 3.5<br>(n = 8) ***                 |

**Supplementary Table 35. Summary of Effects of low-dose retigabine, MTX and IVA on KCNQ2/3 channels.**

Statistics versus same channel in absence of retigabine, MTX and IVA: \*\*\*\*p<0.0001, \*\*\*p=0.0009, \*\*p=0.004, \*p=0.05. Values indicate mean ± SEM.

| KCNQ2                                       | Normalized tail current $V_{0.5}$ (mV) | Non-normalized tail current $V_{0.5}$ (mV) |
|---------------------------------------------|----------------------------------------|--------------------------------------------|
| Ctrl                                        | -46.5 ± 0.7<br>(n = 7)                 | -46.5 ± 5.9<br>(n = 7)                     |
| 1 μM Retigabine                             | -51.7 ± 0.7<br>(n = 7)                 | -51.6 ± 6.6<br>(n = 7) ***                 |
| 1 μM Retigabine<br>1 μM MTX<br>1 μM IVA     | -56.1 ± 0.6<br>(n = 7)                 | -56.4 ± 5.4<br>(n = 7) ****                |
| 1 μM Retigabine<br>10 μM MTX<br>10 μM IVA   | -63.7 ± 0.7<br>(n = 7)                 | -64.1 ± 6.0<br>(n = 7) ****                |
| 10 μM Retigabine<br>30 μM MTX<br>500 μM IVA | n.d.                                   | n.d.                                       |

**Supplementary Table 36. Summary of Effects of retigabine, MTX and IVA on KCNQ2 channels.**

Statistics versus same channel in absence of retigabine, MTX and IVA: \*\*\*\*p<0.0001, \*\*\*p=0.0002.

| KCNQ3*                                      | Normalized tail current $V_{0.5}$ (mV) | Non-normalized tail current $V_{0.5}$ (mV) |
|---------------------------------------------|----------------------------------------|--------------------------------------------|
| Ctrl                                        | -50.8 ± 2.1<br>(n = 11)                | -53.5 ± 8.6<br>(n = 11)                    |
| 1 μM Retigabine                             | -61.9 ± 2.2<br>(n = 11) **             | -63.9 ± 7.7<br>(n = 11)                    |
| 1 μM Retigabine<br>1 μM MTX<br>1 μM IVA     | -74.4 ± 2.4<br>(n = 11) ****           | -76.5 ± 8.0<br>(n = 11)                    |
| 1 μM Retigabine<br>10 μM MTX<br>10 μM IVA   | -91.4 ± 2.6<br>(n = 11) ****           | -91.6 ± 8.7<br>(n = 11) **                 |
| 10 μM Retigabine<br>30 μM MTX<br>500 μM IVA | n.d.                                   | n.d.                                       |

**Supplementary Table 37. Summary of Effects of retigabine, MTX and IVA on KCNQ3\* channels.**

Statistics versus same channel in absence of retigabine, MTX and IVA: \*\*\*\*p<0.0001, \*\*p=0.005.

| KCNQ4                                                      | Normalized tail current $V_{0.5}$ (mV) | Non-normalized tail current $V_{0.5}$ (mV) |
|------------------------------------------------------------|----------------------------------------|--------------------------------------------|
| Ctrl                                                       | $-7.1 \pm 1.5$<br>(n =6)               | $-7.2 \pm 10.5$<br>(n =6)                  |
| 1 $\mu$ M Retigabine                                       | $-9.7 \pm 1.1$<br>(n =6)               | $-10.2 \pm 7.5$<br>(n =6)                  |
| 1 $\mu$ M Retigabine<br>1 $\mu$ M MTX<br>1 $\mu$ M IVA     | $-12.8 \pm 1.1$<br>(n =6) *            | $-13.2 \pm 6.4$<br>(n =6)                  |
| 1 $\mu$ M Retigabine<br>10 $\mu$ M MTX<br>10 $\mu$ M IVA   | $-17.4 \pm 1.7$<br>(n =6) **           | $-18.6 \pm 5.6$<br>(n =6)                  |
| 10 $\mu$ M Retigabine<br>30 $\mu$ M MTX<br>500 $\mu$ M IVA | $-39.8 \pm 3.0$<br>(n =6) ****         | $-37.3 \pm 3.2$<br>(n =6) *                |

**Supplementary Table 38. Summary of Effects of retigabine, MTX and IVA on KCNQ4 channels.**

Statistics versus same channel in absence of retigabine, MTX and IVA: \*\*\*\* $p < 0.0001$ , \*\* $p = 0.004$ , \* $p = 0.05$ .

| KCNQ5                                                      | Normalized tail current $V_{0.5}$ (mV) | Non-normalized tail current $V_{0.5}$ (mV) |
|------------------------------------------------------------|----------------------------------------|--------------------------------------------|
| Ctrl                                                       | $-41.7 \pm 0.9$<br>(n =10)             | $-40.3 \pm 2.4$<br>(n =10)                 |
| 1 $\mu$ M Retigabine                                       | $-46.0 \pm 0.9$<br>(n =6) **           | $-45.8 \pm 2.8$<br>(n =6)                  |
| 1 $\mu$ M Retigabine<br>1 $\mu$ M MTX<br>1 $\mu$ M IVA     | $-49.5 \pm 0.5$<br>(n =6) ****         | $-49.1 \pm 2.4$<br>(n =6) *                |
| 1 $\mu$ M Retigabine<br>10 $\mu$ M MTX<br>10 $\mu$ M IVA   | $-54.6 \pm 0.6$<br>(n =6) ****         | $-53.2 \pm 2.8$<br>(n =6) **               |
| 10 $\mu$ M Retigabine<br>30 $\mu$ M MTX<br>500 $\mu$ M IVA | $-61.4 \pm 0.9$<br>(n =4) ****         | $-60.6 \pm 2.8$<br>(n =4) ***              |

**Supplementary Table 39. Summary of Effects of retigabine, MTX and IVA on KCNQ5 channels.**

Statistics versus same channel in absence of retigabine, MTX and IVA: \*\*\*\* $p < 0.0001$ , \*\*\* $p = 0.0009$ , \*\* $p = 0.004$ , \* $p = 0.05$ .
